# Supplementary material for: Comparative Metagenomics Provides Insight Into the Ecosystem Functioning of the Shark Bay Stromatolites, Western Australia
Source: Front Microbiol. 2018 Jun 25;9:1359. doi: 10.3389/fmicb.2018.01359 (PMC6027182; doi:10.3389/fmicb.2018.01359)
Supplement: Supplementary file 1 [file Data_Sheet_1.XLSX]

## Sheet: Nonlithifying vs. Colloform
Table S1. Differentially abundant genes derived from pairwise comparisons of metagenomes
Level_1	Level_2	Level_3	Level_4	log2FoldChange	p-value (adjusted)
Unclassified	Cellular processes and signaling	Cell growth	sporulation-control protein [K06377]	-5.91	7.6347e-05
Metabolism	Enzyme families	Cytochrome P731	fatty-acid peroxygenase [K15629]	-5.73	3.08461e-15
Environmental Information Processing	Signaling molecules and interaction	Bacterial toxins	thermolabile hemolysin [K11018]	-5.32	0.000889153
Unclassified	Genetic information processing	Replication, recombination and repair proteins	spore photoproduct lyase [K03716]	-5.24	2.48704e-08
Metabolism	Energy Metabolism	Photosynthesis	photosystem I 4.8kDa protein [K02702]	-4.82	2.07961e-06
Environmental Information Processing	Membrane transport	Secretion system	type IV secretion system T-DNA border endonuclease VirD2 [K18434]	-4.79	0.000235881
Environmental Information Processing	Membrane transport	Transporters	maltoporin [K02024]	-3.85	8.4043e-05
Human Diseases	Drug resistance	Antimicrobial resistance genes	aminoglycoside 3'-phosphotransferase I [K19272]	-3.78	7.2047e-06
Environmental Information Processing	Membrane transport	Transporters	MFS transporter, DHA1 family, inner membrane transport protein [K19577]	-3.48	2.04376e-05
Environmental Information Processing	Membrane transport	Transporters	periplasmic iron binding protein [K07230]	-3.37	5.02114e-06
Unclassified	Poorly characterized	Function unknown	uncharacterized protein [K09980]	-3.33	9.43849e-07
Unclassified	Genetic information processing	Replication, recombination and repair proteins	type 1 fimbriae regulatory protein FimB [K07357]	-3.2	1.92082e-17
Metabolism	Xenobiotics Biodegradation and Metabolism	degradation via CoA ligation	benzoate/toluate 1,2-dioxygenase reductase subunit [K05784]	-3.07	2.43817e-05
Unclassified	Genetic information processing	Replication, recombination and repair proteins	type 1 fimbriae regulatory protein FimE [K07358]	-2.99	6.03744e-09
Unclassified	Metabolism	Others	serine/threonine protein phosphatase 2 [K07314]	-2.96	0.000393437
Metabolism	Nucleotide Metabolism	Purine metabolism	xanthine dehydrogenase YagS FAD-binding subunit [K11178]	-2.6	1.92082e-17
Environmental Information Processing	Signal Transduction	Two-component system	K+-transporting ATPase ATPase A chain [K01546]	-2.56	1.26335e-05
Metabolism	Metabolism of terpenoids and polyketides	Terpenoid backbone biosynthesis	phosphomevalonate decarboxylase [K17942]	-2.55	0.000991673
Unclassified	Poorly characterized	Function unknown	uncharacterized protein [K09779]	-2.36	0.000191053
Cellular Processes	Cellular community - prokaryotes	Quorum sensing	acyl homoserine lactone synthase [K13060]	-2.3	1.35141e-06
Cellular Processes	Transport and catabolism	Prokaryotic Defense System	toxin YhaV [K19155]	-2.16	4.47638e-05
Genetic Information Processing	Replication and repair	DNA repair and recombination proteins	DNA repair protein RadB [K04484]	-2.1	0.000215001
Cellular Processes	Transport and catabolism	Prokaryotic Defense System	CRISPR-associated protein Cas5t [K19090]	-2.07	0.000191053
Metabolism	Nucleotide Metabolism	Purine metabolism	xanthine dehydrogenase YagR molybdenum-binding subunit [K11177]	-2.07	1.2983e-18
Metabolism	Biosynthesis of Other Secondary Metabolites	Tropane, piperidine and pyridine alkaloid biosynthesis	homospermidine synthase [K00808]	-2.04	3.06885e-05
Metabolism	Energy Metabolism	Methane metabolism	methanol---5-hydroxybenzimidazolylcobamide Co-methyltransferase [K04480]	-2.02	9.64812e-05
Metabolism	Carbohydrate metabolism	Amino sugar and nucleotide sugar metabolism	exo-1,4-beta-D-glucosaminidase [K15855]	-1.99	1.26335e-05
Environmental Information Processing	Signal Transduction	Two-component system	K+-transporting ATPase ATPase C chain [K01548]	-1.96	0.000574547
Metabolism	Energy Metabolism	Oxidative phosphorylation	NADH-quinone oxidoreductase subunit C/D [K13378]	-1.94	4.74318e-14
Metabolism	Energy Metabolism	Nitrogen metabolism	nitric oxide reductase subunit B [K04561]	-1.92	0.000956121
Unclassified	Metabolism	Biosynthesis and biodegradation of secondary metabolites	6-oxocamphor hydrolase [K20765]	-1.9	2.44076e-10
Metabolism	Energy Metabolism	Photosynthesis - antenna proteins	phycocyanin-associated, rod [K02287]	-1.89	0.000991673
Environmental Information Processing	Membrane transport	Transporters	xanthine permease XanQ [K16346]	-1.89	0.000310598
Environmental Information Processing	Membrane transport	Transporters	putative Mg2+ transporter-C (MgtC) family protein [K07507]	-1.88	0.000123394
Unclassified	Metabolism	Carbohydrate metabolism	glucosylglycerol-phosphate synthase [K03692]	-1.86	4.41313e-10
Metabolism	Energy Metabolism	Nitrogen metabolism	nitric oxide reductase subunit C [K02305]	-1.86	0.000625554
Cellular Processes	Transport and catabolism	Prokaryotic Defense System	CRISPR-associated protein Cst2 [K19075]	-1.85	2.97604e-05
Unclassified	Metabolism	Energy metabolism	molybdenum storage protein [K00947]	-1.84	0.000191053
Metabolism	Xenobiotics Biodegradation and Metabolism	degradation via CoA ligation	2-chlorobenzoate 1,2-dioxygenase [K08686]	-1.79	0.000468761
Metabolism	Amino acid metabolism	Glycine, serine and threonine metabolism	aspartate-semialdehyde dehydrogenase [K15786]	-1.72	1.92082e-17
Environmental Information Processing	Membrane transport	Transporters	xanthine permease XanP [K16345]	-1.72	1.26335e-05
Genetic Information Processing	Transcription	Transcription factors	Lrp/AsnC family transcriptional regulator, regulator of ectoine-degradation genes [K15782]	-1.69	7.09661e-09
Metabolism	Nucleotide Metabolism	Purine metabolism	xanthine dehydrogenase YagT iron-sulfur-binding subunit [K13483]	-1.68	2.03797e-14
Metabolism	Amino acid metabolism	Phenylalanine, tyrosine and tryptophan biosynthesis	indole-3-glycerol phosphate synthase / phosphoribosylanthranilate isomerase [K13498]	-1.63	0.000573941
Metabolism	Biosynthesis of other secondary metabolites	Acarbose and validamycin biosynthesis	2-epi-5-epi-valiolone epimerase [K20431]	-1.6	0.000138718
Metabolism	Nucleotide metabolism	Purine metabolism	FAD-dependent urate hydroxylase [K16839]	-1.59	1.87905e-06
Environmental Information Processing	Signal Transduction	Two-component system	K+-transporting ATPase ATPase B chain [K01547]	-1.59	5.73507e-06
Genetic Information Processing	Replication and repair	DNA repair and recombination proteins	DNA polymerase V [K03502]	-1.56	8.87033e-08
Metabolism	Amino Acid Metabolism	Phenylalanine, tyrosine and tryptophan biosynthesis	anthranilate synthase [K13503]	-1.56	0.000450986
Unclassified	Metabolism	Glycan biosynthesis and metabolism	succinoglycan biosynthesis protein ExoV [K16563]	-1.54	2.11649e-06
Unclassified	Cellular processes and signaling	Inorganic ion transport and metabolism	periplasmic glucans biosynthesis protein [K03670]	-1.53	1.11611e-07
Genetic Information Processing	Replication and repair	DNA repair and recombination proteins	DNA helicase IV [K03658]	-1.53	0.000117759
Genetic Information Processing	Replication and repair	Chromosome and associated proteins	LysR family transcriptional regulator, chromosome initiation inhibitor [K05596]	-1.53	1.99115e-16
Metabolism	Energy Metabolism	Photosynthesis	photosystem II Psb27 protein [K08902]	-1.49	0.000852771
Unclassified	Metabolism	Others	bromide peroxidase [K20206]	-1.49	8.87033e-08
Environmental Information Processing	Membrane transport	Transporters	arsenite transporter [K03325]	-1.46	1.92082e-17
Environmental Information Processing	Membrane transport	Transporters	solute carrier family 39 (zinc transporter), member 11 [K14717]	-1.36	0.000863652
Metabolism	Nucleotide Metabolism	Purine metabolism	phosphoribosylglycinamide formyltransferase 2 [K08289]	-1.36	2.25887e-08
Environmental Information Processing	Membrane transport	Transporters	solute carrier family 5 (sodium/myo-inositol cotransporter), member 11 [K14391]	-1.35	0.00022726
Unclassified	Cellular processes and signaling	Membrane and intracellular structural molecules	cyanophycin synthetase [K03802]	-1.35	2.00362e-12
Environmental Information Processing	Membrane Transport	ABC transporters	glycine betaine/proline transport system substrate-binding protein [K02002]	-1.34	3.04018e-06
Metabolism	Carbohydrate metabolism	Starch and sucrose metabolism	NA [K07024]	-1.34	0.000691351
Unclassified	Poorly characterized	General function prediction only	uncharacterized zinc-type alcohol dehydrogenase-like protein [K13979]	-1.34	3.46094e-21
Metabolism	Enzyme families	Peptidases	protease I [K05520]	-1.32	7.18542e-05
Environmental Information Processing	Membrane transport	Transporters	cobalt-zinc-cadmium efflux system protein [K16264]	-1.31	2.48704e-08
Metabolism	Carbohydrate metabolism	Fructose and mannose metabolism	mannuronan synthase [K19290]	-1.28	6.24629e-08
Genetic Information Processing	Transcription	Transcription factors	phenylacetic acid degradation operon negative regulatory protein [K02616]	-1.27	0.00012514
Metabolism	Metabolism of terpenoids and polyketides	Biosynthesis of type II polyketide products	8-demethyl-8-(2,3-dimethoxy-alpha-L-rhamnosyl)tetracenomycin-C 4'-O-methyltransferase [K19569]	-1.27	2.06298e-09
Unclassified	Metabolism	Glycan biosynthesis and metabolism	exopolysaccharide production protein ExoQ [K16567]	-1.25	0.000990555
Metabolism	Enzyme families	Peptidases	endothelin-converting enzyme-like 1 [K09610]	-1.24	0.000190839
Environmental Information Processing	Membrane transport	Transporters	glycine betaine transporter [K05020]	-1.24	4.74318e-14
Metabolism	Carbohydrate metabolism	Starch and sucrose metabolism	trehalose-6-phosphate hydrolase [K01226]	-1.21	0.000550518
Metabolism	Metabolism of cofactors and vitamins	Ubiquinone and other terpenoid-quinone biosynthesis	NAD(P)H dehydrogenase (quinone) [K03809]	-1.2	3.29303e-05
Metabolism	Biosynthesis of Other Secondary Metabolites	Phenylpropanoid biosynthesis	cinnamyl-alcohol dehydrogenase [K00083]	-1.19	2.38384e-09
Metabolism	Biosynthesis of Other Secondary Metabolites	Novobiocin biosynthesis	demethyldecarbamoylnovobiocin O-methyltransferase [K12712]	-1.19	0.000102589
Metabolism	Enzyme families	Peptidases	cyanophycinase [K13282]	-1.18	0.000373403
Environmental Information Processing	Membrane transport	Transporters	solute carrier family 5 (low affinity sodium-glucose cotransporter), member 4 [K14384]	-1.17	0.000782122
Unclassified	Poorly characterized	Function unknown	uncharacterized protein [K09118]	-1.14	0.000167201
Cellular Processes	Transport and catabolism	Prokaryotic Defense System	restriction system protein [K07448]	-1.13	8.79288e-05
Metabolism	Xenobiotics biodegradation and metabolism	Styrene degradation	aliphatic nitrilase [K01502]	-1.12	9.27878e-05
Cellular Processes	Cellular community - prokaryotes	Biofilm formation - Vibrio cholerae	c-di-GMP phosphodiesterase [K20964]	-1.11	0.000451114
Environmental Information Processing	Membrane transport	Transporters	putative permease [K03548]	-1.11	8.38669e-09
Environmental Information Processing	Membrane transport	Transporters	ferrous iron transport protein A [K04758]	-1.08	0.000375383
Metabolism	Carbohydrate Metabolism	Starch and sucrose metabolism	beta-phosphoglucomutase [K01838]	-1.06	1.30145e-06
Cellular Processes	Cellular community - prokaryotes	Biofilm formation - Pseudomonas aeruginosa	AraC family transcriptional regulator, exoenzyme S synthesis regulatory protein ExsA [K20968]	-1.05	1.49445e-06
Unclassified	Metabolism	Others	aspartate beta-hydroxylase [K00476]	-1.04	8.82416e-11
Cellular Processes	Cell motility	Cytoskeleton proteins	cell division topological specificity factor [K03608]	-1.03	3.49958e-07
Environmental Information Processing	Signal transduction	Two-component system	short-chain fatty acids transporter [K02106]	-1	0.000430617
Metabolism	Carbohydrate metabolism	Starch and sucrose metabolism	(1->4)-alpha-D-glucan 1-alpha-D-glucosylmutase [K06044]	-0.99	0.000352878
Environmental Information Processing	Membrane Transport	Bacterial secretion system	type VI secretion system secreted protein Hcp [K11903]	-0.98	1.45118e-05
Genetic Information Processing	Translation	Ribosome biogenesis	ribosomal protein S12 methylthiotransferase accessory factor [K09136]	-0.97	2.89081e-07
Metabolism	Amino acid metabolism	Alanine, aspartate and glutamate metabolism	succinate-semialdehyde dehydrogenase [K08324]	-0.97	9.23921e-13
Unclassified	Metabolism	Others	PKHD-type hydroxylase [K07336]	-0.96	7.0189e-06
Environmental Information Processing	Membrane Transport	ABC transporters	iron complex transport system substrate-binding protein [K02016]	-0.96	0.000486179
Genetic Information Processing	Replication and repair	Chromosome and associated proteins	DNA excision repair protein ERCC-6-like [K20093]	-0.95	0.00096811
Unclassified	Cellular processes and signaling	Signal transduction mechanisms	PhoH-like ATPase [K07175]	-0.95	8.87033e-08
Environmental Information Processing	Membrane transport	Transporters	choline/glycine/proline betaine transport protein [K02168]	-0.95	6.94636e-14
Metabolism	Carbohydrate Metabolism	Propanoate metabolism	acetoacetate decarboxylase [K01574]	-0.95	4.6543e-07
Metabolism	Carbohydrate Metabolism	Galactose metabolism	alpha-glucosidase [K01187]	-0.93	1.00912e-08
Unclassified	Poorly characterized	Function unknown	uncharacterized protein [K07089]	-0.92	1.29765e-05
Unclassified	Poorly characterized	Function unknown	uncharacterized protein [K09781]	-0.91	3.80204e-05
Environmental Information Processing	Membrane Transport	ABC transporters	histidine transport system permease protein [K10016]	-0.87	0.000266354
Metabolism	Metabolism of cofactors and vitamins	Porphyrin and chlorophyll metabolism	cob(I)alamin adenosyltransferase [K19221]	-0.86	0.00093316
Environmental Information Processing	Membrane Transport	ABC transporters	ATP-binding cassette, subfamily C, bacterial [K06148]	-0.86	0.000191053
Metabolism	Energy metabolism	Methane metabolism	dimethylamine corrinoid protein [K16179]	-0.84	1.11885e-05
Environmental Information Processing	Signal Transduction	Two-component system	two-component system, OmpR family, sensor histidine kinase KdpD [K07646]	-0.82	9.43849e-07
Environmental Information Processing	Membrane transport	Transporters	putative thiamine transport system substrate-binding protein [K05777]	-0.82	0.000619641
Environmental Information Processing	Membrane transport	ABC transporters	phospholipid/cholesterol/gamma-HCH transport system substrate-binding protein [K02067]	-0.81	9.47508e-05
Metabolism	Carbohydrate metabolism	Starch and sucrose metabolism	maltooligosyltrehalose trehalohydrolase [K01236]	-0.81	0.000261662
Metabolism	Metabolism of Cofactors and Vitamins	Nicotinate and nicotinamide metabolism	nicotinate phosphoribosyltransferase [K00763]	-0.79	6.80145e-09
Environmental Information Processing	Membrane Transport	ABC transporters	putrescine transport system substrate-binding protein [K11073]	-0.79	3.06885e-05
Metabolism	Carbohydrate Metabolism	Amino sugar and nucleotide sugar metabolism	CDP-6-deoxy-D-xylo-4-hexulose-3-dehydrase [K12452]	-0.79	0.000480819
Metabolism	Enzyme families	Protein kinases	phototropin [K20715]	-0.78	0.000573941
Environmental Information Processing	Membrane transport	Transporters	sulfate permease, SulP family [K03321]	-0.77	0.000145744
Metabolism	Amino acid metabolism	Glycine, serine and threonine metabolism	L-2,4-diaminobutyrate transaminase [K15785]	-0.77	0.000389963
Metabolism	Carbohydrate Metabolism	Inositol phosphate metabolism	inosose dehydratase [K03335]	-0.77	0.000220106
Environmental Information Processing	Membrane Transport	ABC transporters	manganese/iron transport system substrate-binding protein [K11604]	-0.77	4.6543e-07
Environmental Information Processing	Membrane transport	Transporters	sodium/proline symporter [K11928]	-0.77	2.0028e-05
Metabolism	Carbohydrate metabolism	Starch and sucrose metabolism	isoamylase [K01214]	-0.76	0.000241833
Environmental Information Processing	Membrane transport	Transporters	multicomponent K+:H+ antiporter subunit D [K05561]	-0.75	0.00047092
Genetic Information Processing	Translation	Ribosome biogenesis	oligoribonuclease [K13288]	-0.75	0.000691351
Metabolism	Carbohydrate Metabolism	Pyruvate metabolism	pyruvate, water dikinase [K01007]	-0.73	2.49046e-07
Environmental Information Processing	Membrane transport	ABC transporters	putrescine transport system permease protein [K11075]	-0.73	0.000547877
Environmental Information Processing	Signal transduction	Two-component system	cytochrome d ubiquinol oxidase subunit I [K00425]	-0.72	8.86182e-05
Cellular Processes	Transport and catabolism	Prokaryotic Defense System	type I restriction enzyme, R subunit [K01153]	-0.72	0.000446956
Metabolism	Energy Metabolism	Nitrogen metabolism	carbonic anhydrase [K01673]	-0.72	1.15771e-11
Cellular Processes	Cell motility	Cytoskeleton proteins	septum site-determining protein MinC [K03610]	-0.71	5.19993e-05
Unclassified	Genetic information processing	Others	phage shock protein A [K03969]	-0.7	0.000852771
Metabolism	Energy metabolism	Photosynthesis - antenna proteins	photosynthetic reaction center cytochrome c subunit [K13992]	-0.7	0.00027831
Environmental Information Processing	Membrane transport	ABC transporters	putrescine transport system permease protein [K11074]	-0.7	0.000298538
Unclassified	Metabolism	Glycan biosynthesis and metabolism	glycosyltransferase EpsJ [K19427]	-0.69	0.000691351
Metabolism	Metabolism of Cofactors and Vitamins	Porphyrin and chlorophyll metabolism	magnesium-protoporphyrin IX monomethyl ester (oxidative) cyclase [K04035]	-0.69	3.4652e-05
Unclassified	Cellular processes and signaling	Membrane and intracellular structural molecules	poly-gamma-glutamate synthesis protein (capsule biosynthesis protein) [K07282]	-0.69	0.000468761
Unclassified	Metabolism	Biosynthesis and biodegradation of secondary metabolites	chromate reductase [K19784]	-0.68	0.000251159
Metabolism	Carbohydrate Metabolism	Pyruvate metabolism	D-lactate dehydrogenase [K03778]	-0.68	0.000110689
Metabolism	Energy metabolism	Photosynthesis - antenna proteins	photosynthetic reaction center L subunit [K08928]	-0.68	0.000430617
Environmental Information Processing	Membrane Transport	ABC transporters	phosphonate transport system substrate-binding protein [K02044]	-0.68	0.00056158
Genetic Information Processing	Replication and repair	Chromosome and associated proteins	curved DNA-binding protein [K05516]	-0.68	0.00022726
Metabolism	Nucleotide metabolism	Purine metabolism	ureidoglycolate amidohydrolase [K18151]	-0.67	0.000991673
Unclassified	Metabolism	Amino acid metabolism	glutathionyl-hydroquinone reductase [K07393]	-0.67	1.20085e-11
Metabolism	Carbohydrate metabolism	Starch and sucrose metabolism	glycogen debranching enzyme [K02438]	-0.66	0.000516555
Metabolism	Amino acid metabolism	Phenylalanine metabolism	ring-1,2-phenylacetyl-CoA epoxidase subunit PaaC [K02611]	-0.66	0.00047092
Metabolism	Carbohydrate metabolism	Starch and sucrose metabolism	alpha,alpha-trehalase [K01194]	-0.66	0.000991673
Environmental Information Processing	Membrane Transport	ABC transporters	phosphate transport system substrate-binding protein [K02040]	-0.66	0.000191053
Cellular Processes	Cell motility	Cytoskeleton proteins	septum site-determining protein MinD [K03609]	-0.64	1.37342e-05
Environmental Information Processing	Membrane transport	Transporters	multidrug efflux pump [K18142]	-0.64	5.92279e-08
Unclassified	Genetic information processing	Replication, recombination and repair proteins	putative transposase [K07493]	-0.64	0.000173333
Metabolism	Amino acid metabolism	Phenylalanine metabolism	ring-1,2-phenylacetyl-CoA epoxidase subunit PaaE [K02613]	-0.64	4.2769e-05
Unclassified	Poorly characterized	General function prediction only	putative membrane protein [K08973]	-0.62	0.000261662
Environmental Information Processing	Membrane Transport	ABC transporters	sn-glycerol 3-phosphate transport system permease protein [K05815]	-0.61	7.6347e-05
Genetic Information Processing	Replication and repair	DNA repair and recombination proteins	CRISP-associated protein Cas1 [K15342]	-0.6	0.000574547
Metabolism	Glycan biosynthesis and metabolism	Peptidoglycan biosynthesis and degradation proteins	muramoyltetrapeptide carboxypeptidase [K01297]	-0.59	0.000240689
Metabolism	Energy Metabolism	Nitrogen metabolism	ferredoxin-nitrite reductase [K00366]	-0.59	5.39989e-05
Environmental Information Processing	Membrane transport	ABC transporters	glycine betaine/proline transport system ATP-binding protein [K02000]	-0.59	0.000235881
Metabolism	Carbohydrate Metabolism	Starch and sucrose metabolism	1,4-alpha-glucan branching enzyme [K00700]	-0.56	1.29765e-05
Unclassified	Cellular processes and signaling	Signal transduction mechanisms	isocitrate dehydrogenase kinase/phosphatase [K00906]	-0.55	0.000153469
Environmental Information Processing	Membrane Transport	ABC transporters	glycine betaine/proline transport system permease protein [K02001]	-0.54	0.000241833
Unclassified	Cellular processes and signaling	Transport	solute:Na+ symporter, SSS family [K03307]	-0.54	0.00027831
Metabolism	Metabolism of Cofactors and Vitamins	Porphyrin and chlorophyll metabolism	uroporphyrin-III C-methyltransferase [K02303]	-0.53	0.000907559
Metabolism	Enzyme families	Peptidases	prolyl oligopeptidase [K01322]	-0.52	1.37342e-05
Metabolism	Energy metabolism	Methane metabolism	fructose-bisphosphate aldolase, class I [K11645]	-0.52	5.08316e-05
Genetic Information Processing	Replication and Repair	Homologous recombination	exodeoxyribonuclease V alpha subunit [K03581]	-0.52	0.000123394
Genetic Information Processing	Translation	Translation factors	peptide chain release factor 3 [K02837]	-0.51	0.000336761
Metabolism	Metabolism of Cofactors and Vitamins	Folate biosynthesis	para-aminobenzoate synthetase [K13950]	-0.49	0.00071718
Unclassified	Genetic information processing	Protein folding and associated processing	ATP-dependent Clp protease adaptor protein ClpS [K06891]	-0.48	6.70162e-06
Environmental Information Processing	Membrane Transport	ABC transporters	phosphate transport system permease protein [K02038]	-0.48	1.16396e-06
Genetic Information Processing	Translation	Ribosome biogenesis	ribosomal protein S6--L-glutamate ligase [K05844]	-0.47	4.87979e-07
Metabolism	Carbohydrate Metabolism	Starch and sucrose metabolism	starch synthase [K00703]	-0.47	0.000468761
Cellular Processes	Cell motility	Bacterial motility proteins	leader peptidase (prepilin peptidase) / N-methyltransferase [K02654]	-0.46	1.82471e-05
Metabolism	Energy Metabolism	Oxidative phosphorylation	NADH dehydrogenase [K03885]	-0.45	0.000444277
Metabolism	Carbohydrate Metabolism	Glycolysis / Gluconeogenesis	L-lactate dehydrogenase [K00016]	-0.44	0.000191053
Environmental Information Processing	Membrane Transport	ABC transporters	phosphate transport system permease protein [K02037]	-0.44	1.98898e-08
Metabolism	Metabolism of Cofactors and Vitamins	Biotin metabolism	8-amino-7-oxononanoate synthase [K00652]	-0.43	8.76097e-06
Environmental Information Processing	Membrane Transport	ABC transporters	phosphate transport system ATP-binding protein [K02036]	-0.42	5.52882e-05
Metabolism	Metabolism of cofactors and vitamins	Biotin metabolism	3-hydroxyacyl-[acyl-carrier-protein] dehydratase [K02372]	-0.38	0.000389963
Metabolism	Carbohydrate Metabolism	Pentose phosphate pathway	deoxyribose-phosphate aldolase [K01619]	-0.38	0.000102236
Metabolism	Carbohydrate Metabolism	Glycolysis / Gluconeogenesis	pyruvate kinase [K00873]	-0.37	7.58041e-07
Metabolism	Carbohydrate Metabolism	Pentose phosphate pathway	transaldolase [K00616]	-0.36	7.6347e-05
Metabolism	Biosynthesis of Polyketides and Terpenoids	Polyketide sugar unit biosynthesis	dTDP-4-dehydrorhamnose 3,5-epimerase [K01790]	-0.36	0.000326821
Metabolism	Amino acid metabolism	Cysteine and methionine metabolism	cystathionine beta-synthase [K01697]	-0.36	0.000956121
Metabolism	Energy metabolism	Oxidative phosphorylation	polyphosphate kinase [K00937]	-0.34	0.000461168
Metabolism	Carbohydrate Metabolism	Pyruvate metabolism	phosphoenolpyruvate carboxylase [K01595]	-0.32	0.000574631
Metabolism	Amino acid metabolism	Cysteine and methionine metabolism	adenosylhomocysteinase [K01251]	-0.32	0.000153469
Cellular Processes	Transport and catabolism	Exosome	4a-hydroxytetrahydrobiopterin dehydratase [K01724]	-0.32	0.000857254
Genetic Information Processing	Replication and repair	Chromosome and associated proteins	rod shape determining protein RodA [K05837]	-0.3	0.000419882
Metabolism	Enzyme families	Peptidases	protease IV [K04773]	-0.27	0.00011465
Metabolism	Enzyme families	Peptidases	carboxyl-terminal processing protease [K03797]	-0.27	0.000430617
Metabolism	Carbohydrate metabolism	Fructose and mannose metabolism	xylose isomerase [K01805]	0.39	0.000551508
Metabolism	Xenobiotics Biodegradation and Metabolism	Chlorocyclohexane and chlorobenzene degradation	haloalkane dehalogenase [K01563]	0.4	0.000965757
Environmental Information Processing	Membrane transport	Transporters	aquaporin NIP [K09874]	0.47	0.000419882
Unclassified	Cellular processes and signaling	Inorganic ion transport and metabolism	arylsulfatase I/J [K12375]	0.49	0.000857254
Metabolism	Carbohydrate Metabolism	Galactose metabolism	galactokinase [K00849]	0.51	0.000383782
Metabolism	Lipid Metabolism	Fatty acid degradation	long-chain-acyl-CoA dehydrogenase [K00255]	0.54	0.00023601
Metabolism	Lipid Metabolism	Sphingolipid metabolism	arylsulfatase A [K01134]	0.54	0.000386096
Unclassified	Metabolism	Energy metabolism	Na+-transporting NADH:ubiquinone oxidoreductase subunit B [K00347]	0.57	0.000599853
Metabolism	Energy metabolism	Nitrogen metabolism	nitronate monooxygenase [K00459]	0.6	0.000902981
Metabolism	Glycan Biosynthesis and Metabolism	Glycosaminoglycan degradation	arylsulfatase B [K01135]	0.67	1.62403e-05
Unclassified	Metabolism	Others	retinol dehydrogenase 14 [K11162]	0.69	6.31078e-09
Metabolism	Amino Acid Metabolism	Arginine and proline metabolism	agmatine deiminase [K10536]	0.7	0.000140951
Metabolism	Energy metabolism	Sulfur metabolism	thiosulfate reductase / polysulfide reductase chain A [K08352]	0.75	0.000127601
Cellular Processes	Cell Motility	Bacterial chemotaxis	chemotaxis protein CheD [K03411]	0.83	0.000314261
Unclassified	Metabolism	Carbohydrate metabolism	sulfofructose kinase [K18478]	0.86	0.000480819
Metabolism	Glycan Biosynthesis and Metabolism	Other glycan degradation	alpha-L-fucosidase [K01206]	0.91	0.000298538
Unclassified	Cellular processes and signaling	Transport	bile acid:Na+ symporter, BASS family [K03453]	0.91	1.57368e-07
Metabolism	Enzyme families	Peptidases	tripeptidyl-peptidase II [K01280]	0.99	1.0503e-06
Metabolism	Energy metabolism	Sulfur metabolism	anaerobic dimethyl sulfoxide reductase subunit B (DMSO reductase iron- sulfur subunit) [K07307]	1.03	0.000191053
Metabolism	Energy metabolism	Carbon fixation pathways in prokaryotes	4-hydroxybutyryl-CoA dehydratase / vinylacetyl-CoA-Delta-isomerase [K14534]	1.07	3.91026e-06
Unclassified	Poorly characterized	Function unknown	uncharacterized protein [K09123]	1.08	0.000282981
Metabolism	Xenobiotics biodegradation and metabolism	Metabolism of xenobiotics by cytochrome P457	microsomal epoxide hydrolase [K01253]	1.09	0.000736471
Unclassified	Poorly characterized	Function unknown	uncharacterized protein [K09990]	1.1	5.41777e-05
Metabolism	Amino acid metabolism	Arginine and proline metabolism	polyamine oxidase [K17839]	1.13	0.000423697
Metabolism	Carbohydrate Metabolism	Fructose and mannose metabolism	fructan beta-fructosidase [K03332]	1.14	9.86698e-13
Genetic Information Processing	Replication and repair	Chromosome and associated proteins	bifunctional lysine-specific demethylase and histidyl-hydroxylase NO66 [K16914]	1.15	0.000277341
Environmental Information Processing	Membrane transport	Transporters	solute carrier family 34 (sodium-dependent phosphate cotransporter) [K14683]	1.19	0.000191053
Unclassified	Metabolism	Energy metabolism	sulfide dehydrogenase subunit alpha [K20202]	1.21	7.69526e-07
Genetic Information Processing	Replication and Repair	Base excision repair	AraC family transcriptional regulator, regulatory protein of adaptative response / DNA-3-methyladenine glycosylase II [K13529]	1.21	1.26335e-05
Metabolism	Lipid Metabolism	Primary bile acid biosynthesis	solute carrier family 27 (fatty acid transporter), member 5 [K08748]	1.21	5.39989e-05
Metabolism	Xenobiotics biodegradation and metabolism	Benzoate degradation	4-oxalomesaconate tautomerase [K16514]	1.22	0.000214154
Metabolism	Glycan biosynthesis and metabolism	Other glycan degradation	alpha-L-fucosidase 2 [K15923]	1.24	0.000298538
Unclassified	Cellular processes and signaling	Membrane and intracellular structural molecules	inner membrane protein [K06143]	1.25	4.56369e-07
Metabolism	Carbohydrate Metabolism	Ascorbate and aldarate metabolism	L-gulonolactone oxidase [K00103]	1.29	0.000120991
Unclassified	Metabolism	Carbohydrate metabolism	3,6-anhydro-alpha-L-galactose dehydrogenase [K20548]	1.29	0.000491489
Environmental Information Processing	Membrane transport	Transporters	trimethylamine-N-oxide reductase (cytochrome c) [K07812]	1.31	0.000110467
Environmental Information Processing	Signal Transduction	Two-component system	methyl-accepting chemotaxis protein IV, peptide sensor receptor [K05877]	1.31	0.000191053
Unclassified	Metabolism	Others	dehydrogenase/reductase SDR family member 12 [K11168]	1.32	9.17939e-05
Unclassified	Poorly characterized	Function unknown	uncharacterized protein [K09984]	1.34	2.11649e-06
Metabolism	Metabolism of terpenoids and polyketides	Monoterpenoid biosynthesis	linalool 8-monooxygenase [K05525]	1.39	1.28343e-05
Cellular Processes	Transport and Catabolism	Peroxisome	solute carrier family 27 (fatty acid transporter), member 2 [K08746]	1.39	1.29765e-05
Metabolism	Lipid metabolism	Glycerophospholipid metabolism	ethanolamine ammonia-lyase small subunit [K03736]	1.43	0.000373403
Unclassified	Metabolism	Energy metabolism	thiosulfate dehydrogenase [K19713]	1.43	8.53012e-05
Environmental Information Processing	Membrane transport	Transporters	peptide/bleomycin uptake transporter [K17938]	1.44	1.91296e-07
Unclassified	Metabolism	Biosynthesis and biodegradation of secondary metabolites	carboxylesterase 3/5 [K15743]	1.49	0.000894378
Metabolism	Carbohydrate metabolism	Glyoxylate and dicarboxylate metabolism	oxalyl-CoA decarboxylase [K01577]	1.51	6.70162e-06
Metabolism	Enzyme families	KEGG modules in global maps only	pentalenolactone D synthase [K18091]	1.55	3.74398e-08
Metabolism	Energy metabolism	Carbon fixation in photosynthetic organisms	aspartate aminotransferase, mitochondrial [K14455]	1.55	0.000804089
Metabolism	Carbohydrate Metabolism	Glycolysis / Gluconeogenesis	aldehyde:ferredoxin oxidoreductase [K03738]	1.56	0.000603921
Human Diseases	Immune System Diseases	Systemic lupus erythematosus	60 kDa SS-A/Ro ribonucleoprotein [K11089]	1.56	7.37544e-08
Environmental Information Processing	Signaling molecules and interaction	Cell adhesion molecules and their ligands	protocadherin Fat 1/2/3 [K16506]	1.61	0.000298538
Metabolism	Xenobiotics biodegradation and metabolism	Chloroalkane and chloroalkene degradation	acetylene hydratase [K20625]	1.62	6.80145e-09
Metabolism	Enzyme families	Cytochrome P707	steroid 15beta-monooxygenase [K21114]	1.7	0.000907559
Metabolism	Xenobiotics biodegradation and metabolism	Steroid degradation	cholest-4-en-3-one 26-monooxygenase [K16046]	1.74	0.000945366
Metabolism	Lipid metabolism	Secondary bile acid biosynthesis	bile acid-coenzyme A ligase [K15868]	1.82	1.45118e-05
Unclassified	Poorly characterized	Function unknown	uncharacterized protein [K09974]	1.85	3.64483e-07
Metabolism	Metabolism of terpenoids and polyketides	Biosynthesis of 12-, 14- and 16-membered macrolides	20-oxo-5-O-mycaminosyltylactone 23-monooxygenase [K15991]	1.93	0.000159929
Genetic Information Processing	Translation	Transfer RNA biogenesis	tRNA (cytosine38-C5)-methyltransferase [K15336]	2	0.000159929
Genetic Information Processing	Transcription	Spliceosome	pre-mRNA-splicing helicase BRR2 [K12854]	2	0.000978776
Metabolism	Energy metabolism	Methane metabolism	methylamine dehydrogenase light chain [K15228]	2.08	0.000249359
Human Diseases	Drug resistance	Antimicrobial resistance genes	aminoglycoside 3-N-acetyltransferase IV [K19276]	2.1	0.000261662
Genetic Information Processing	Translation	Mitochondrial biogenesis	mitochondrial chaperone BCS1 [K08900]	2.12	2.56505e-06
Genetic Information Processing	Translation	Mitochondrial biogenesis	DNA-directed RNA polymerase, mitochondrial [K10908]	2.17	4.44927e-08
Genetic Information Processing	Replication and repair	Chromosome and associated proteins	histone deacetylase 3 [K11404]	2.36	0.000541717
Unclassified	Poorly characterized	General function prediction only	modulator of drug activity B [K03923]	2.39	0.00053643
Environmental Information Processing	Membrane transport	Transporters	cellulose synthase operon protein B [K20541]	2.41	0.000409581
Metabolism	Enzyme families	Cytochrome P724	cytochrome P450 family 128 [K21199]	2.5	2.15352e-05
Genetic Information Processing	Transcription	Transcription factors	IclR family transcriptional regulator, mhp operon transcriptional activator [K05818]	2.91	2.28624e-05
Metabolism	Lipid metabolism	Fatty acid degradation	carnitine O-palmitoyltransferase 1, liver isoform [K08765]	3.09	0.000369877
Cellular Processes	Transport and Catabolism	Peroxisome	carnitine O-acetyltransferase [K00624]	3.13	8.53012e-05
Metabolism	Carbohydrate Metabolism	Butanoate metabolism	maleate isomerase [K01799]	3.43	1.26335e-05
Unclassified	Metabolism	Glycan biosynthesis and metabolism	beta-porphyranase [K20830]	4.49	0.000358248
Unclassified	Metabolism	Biosynthesis and biodegradation of secondary metabolites	phenolic acid decarboxylase [K13727]	4.51	1.48436e-07
Genetic Information Processing	Transcription	Transcription factors	heat shock transcription factor, other eukaryote [K09419]	4.57	0.000403765

## Sheet: Nonlithifying vs. Smooth
Table S1. Differentially abundant genes derived from pairwise comparisons of metagenomes
Level_1	Level_2	Level_3	Level_4	log2FoldChange	p-value (adjusted)
Unclassified	Cellular processes and signaling	Cell growth	sporulation-control protein [K06377]	-6.39	8.14377e-05
Environmental Information Processing	Membrane transport	Secretion system	type IV secretion system protein PtlE [K12081]	-6.15	0.000199728
Metabolism	Enzyme families	Cytochrome P731	fatty-acid peroxygenase [K15629]	-4.92	9.16132e-11
Environmental Information Processing	Membrane transport	Secretion system	type IV secretion system T-DNA border endonuclease VirD2 [K18434]	-4.76	0.000933689
Environmental Information Processing	Signal Transduction	Two-component system	K+-transporting ATPase ATPase A chain [K01546]	-4.22	9.71132e-13
Environmental Information Processing	Signal Transduction	Two-component system	K+-transporting ATPase ATPase C chain [K01548]	-4.07	5.95005e-11
Genetic Information Processing	Translation	Mitochondrial biogenesis	mitochondrial genome maintenance exonuclease 1 [K19465]	-3.91	0.000735445
Unclassified	Genetic information processing	Replication, recombination and repair proteins	spore photoproduct lyase [K03716]	-3.8	0.000155003
Unclassified	Genetic information processing	Replication, recombination and repair proteins	type 1 fimbriae regulatory protein FimB [K07357]	-3.72	9.56911e-20
Unclassified	Metabolism	Glycan biosynthesis and metabolism	1,2-beta-oligoglucan phosphorylase [K21298]	-3.56	9.66875e-10
Cellular Processes	Transport and catabolism	Prokaryotic Defense System	CRISPR-associated protein Csx3 [K19144]	-3.49	0.000158623
Unclassified	Poorly characterized	Function unknown	uncharacterized protein [K09980]	-3.44	5.75398e-06
Unclassified	Genetic information processing	Replication, recombination and repair proteins	type 1 fimbriae regulatory protein FimE [K07358]	-3.4	2.19227e-10
Environmental Information Processing	Membrane transport	Transporters	MFS transporter, DHA1 family, inner membrane transport protein [K19577]	-3.36	0.000155003
Metabolism	Energy Metabolism	Photosynthesis	photosystem I 4.8kDa protein [K02702]	-2.98	0.000242519
Metabolism	Xenobiotics Biodegradation and Metabolism	degradation via CoA ligation	benzoate/toluate 1,2-dioxygenase reductase subunit [K05784]	-2.81	0.000329745
Environmental Information Processing	Membrane Transport	Bacterial secretion system	type IV secretion system protein VirB10 [K03195]	-2.71	4.48449e-06
Metabolism	Nucleotide Metabolism	Purine metabolism	xanthine dehydrogenase YagS FAD-binding subunit [K11178]	-2.71	6.56105e-17
Metabolism	Energy Metabolism	Photosynthesis	photosystem II PsbJ protein [K02711]	-2.46	0.000223578
Genetic Information Processing	Translation	Ribosome biogenesis	ribonuclease III family protein [K11145]	-2.46	9.52771e-08
Metabolism	Energy Metabolism	Nitrogen metabolism	nitric oxide reductase subunit B [K04561]	-2.44	4.17448e-05
Cellular Processes	Transport and catabolism	Prokaryotic Defense System	CRISPR-associated protein Cas5t [K19090]	-2.38	5.9598e-05
Environmental Information Processing	Membrane transport	Transporters	uracil permease [K02824]	-2.36	0.000621388
Metabolism	Energy Metabolism	Photosynthesis - antenna proteins	phycocyanin-associated, rod [K02287]	-2.26	0.000155003
Metabolism	Nucleotide Metabolism	Purine metabolism	xanthine dehydrogenase YagR molybdenum-binding subunit [K11177]	-2.23	1.97004e-19
Metabolism	Energy Metabolism	Nitrogen metabolism	nitric oxide reductase subunit C [K02305]	-2.16	0.000155003
Metabolism	Biosynthesis of Other Secondary Metabolites	Tropane, piperidine and pyridine alkaloid biosynthesis	homospermidine synthase [K00808]	-2.15	3.44456e-05
Environmental Information Processing	Signal Transduction	Two-component system	K+-transporting ATPase ATPase B chain [K01547]	-2.14	1.50727e-09
Unclassified	Metabolism	Biosynthesis and biodegradation of secondary metabolites	6-oxocamphor hydrolase [K20765]	-2.14	1.3762e-11
Metabolism	Nucleotide metabolism	Purine metabolism	FAD-dependent urate hydroxylase [K16839]	-2.12	2.88293e-09
Environmental Information Processing	Membrane transport	Transporters	xanthine permease XanQ [K16346]	-2.08	0.000182752
Environmental Information Processing	Membrane Transport	ABC transporters	manganese transport system permease protein [K11602]	-2.04	0.000223578
Unclassified	Metabolism	Carbohydrate metabolism	glucosylglycerol-phosphate synthase [K03692]	-2.02	9.6612e-11
Cellular Processes	Transport and catabolism	Prokaryotic Defense System	CRISPR-associated protein Cst2 [K19075]	-1.99	2.47783e-05
Metabolism	Energy Metabolism	Photosynthesis	plastocyanin [K02638]	-1.98	0.000155003
Environmental Information Processing	Membrane Transport	ABC transporters	putative ATP-binding cassette transporter [K02471]	-1.98	6.64046e-06
Metabolism	Xenobiotics Biodegradation and Metabolism	degradation via CoA ligation	2-chlorobenzoate 1,2-dioxygenase [K08686]	-1.93	0.000388658
Metabolism	Energy Metabolism	Photosynthesis	photosystem II Psb27 protein [K08902]	-1.91	4.19296e-05
Unclassified	Metabolism	Metabolism of cofactors and vitamins	phytol kinase [K18678]	-1.9	0.000316081
Metabolism	Biosynthesis of other secondary metabolites	Acarbose and validamycin biosynthesis	2-epi-5-epi-valiolone epimerase [K20431]	-1.88	2.86434e-05
Environmental Information Processing	Signal Transduction	Calcium signaling pathway	phosphorylase kinase alpha/beta subunit [K07190]	-1.85	0.000931715
Genetic Information Processing	Transcription	Transcription factors	Lrp/AsnC family transcriptional regulator, regulator of ectoine-degradation genes [K15782]	-1.84	1.53901e-09
Metabolism	Nucleotide Metabolism	Purine metabolism	xanthine dehydrogenase YagT iron-sulfur-binding subunit [K13483]	-1.82	5.26468e-15
Metabolism	Metabolism of Cofactors and Vitamins	Ubiquinone and other terpenoid-quinone biosynthesis	tocopherol cyclase [K09834]	-1.82	0.000412287
Metabolism	Energy Metabolism	Photosynthesis	photosystem II 13kDa protein [K08903]	-1.81	5.5775e-05
Metabolism	Carbohydrate metabolism	Amino sugar and nucleotide sugar metabolism	exo-1,4-beta-D-glucosaminidase [K15855]	-1.78	0.000286714
Metabolism	Energy Metabolism	Photosynthesis - antenna proteins	phycobilisome core component [K02097]	-1.75	0.000854153
Metabolism	Amino acid metabolism	Glycine, serine and threonine metabolism	aspartate-semialdehyde dehydrogenase [K15786]	-1.75	5.03511e-16
Unclassified	Cellular processes and signaling	Membrane and intracellular structural molecules	cyanophycin synthetase [K03802]	-1.7	6.89288e-18
Genetic Information Processing	Replication and repair	DNA repair and recombination proteins	DNA helicase IV [K03658]	-1.7	5.19507e-05
Metabolism	Energy Metabolism	Oxidative phosphorylation	NAD(P)H-quinone oxidoreductase subunit H [K05579]	-1.67	0.000481484
Unclassified	Metabolism	Others	bromide peroxidase [K20206]	-1.66	1.12579e-08
Unclassified	Metabolism	Carbohydrate metabolism	carbon dioxide concentrating mechanism protein CcmO [K08700]	-1.66	0.000316081
Metabolism	Energy Metabolism	Oxidative phosphorylation	NAD(P)H-quinone oxidoreductase subunit N [K05585]	-1.65	0.000182752
Environmental Information Processing	Membrane Transport	ABC transporters	putative multiple sugar transport system substrate-binding protein [K10546]	-1.61	0.000184219
Metabolism	Energy Metabolism	Oxidative phosphorylation	NADH-quinone oxidoreductase subunit C/D [K13378]	-1.6	1.03246e-08
Metabolism	Amino Acid Metabolism	Phenylalanine, tyrosine and tryptophan biosynthesis	anthranilate synthase [K13503]	-1.56	0.000911003
Metabolism	Enzyme families	Peptidases	cyanophycinase [K13282]	-1.53	5.75398e-06
Metabolism	Xenobiotics Biodegradation and Metabolism	degradation via CoA ligation	benzoate/toluate 1,2-dioxygenase alpha subunit [K05549]	-1.51	0.000353268
Environmental Information Processing	Membrane Transport	ABC transporters	glycine betaine/proline transport system substrate-binding protein [K02002]	-1.51	3.89535e-07
Environmental Information Processing	Membrane transport	Transporters	xanthine permease XanP [K16345]	-1.5	0.000426382
Unclassified	Cellular processes and signaling	Inorganic ion transport and metabolism	periplasmic glucans biosynthesis protein [K03670]	-1.46	2.57359e-06
Metabolism	Energy Metabolism	Carbon fixation in photosynthetic organisms	phosphoribulokinase [K00855]	-1.37	0.000766739
Environmental Information Processing	Membrane transport	Transporters	cobalt-zinc-cadmium efflux system protein [K16264]	-1.35	4.55229e-08
Genetic Information Processing	Replication and repair	Chromosome and associated proteins	LysR family transcriptional regulator, chromosome initiation inhibitor [K05596]	-1.35	2.25029e-11
Metabolism	Energy metabolism	Nitrogen metabolism	MFS transporter, NNP family, nitrate/nitrite transporter [K02575]	-1.34	0.0002422
Metabolism	Biosynthesis of Polyketides and Terpenoids	Carotenoid biosynthesis	prolycopene isomerase [K09835]	-1.32	0.000198706
Metabolism	Carbohydrate metabolism	Fructose and mannose metabolism	mannuronan synthase [K19290]	-1.32	1.27479e-07
Unclassified	Metabolism	Metabolism of cofactors and vitamins	all-trans-8'-apo-beta-carotenal 15,15'-oxygenase [K00464]	-1.31	0.000123634
Environmental Information Processing	Membrane transport	Transporters	arsenite transporter [K03325]	-1.28	5.69243e-12
Unclassified	Poorly characterized	Function unknown	uncharacterized protein [K09118]	-1.27	4.89576e-05
Genetic Information Processing	Replication and repair	DNA repair and recombination proteins	DNA polymerase V [K03502]	-1.25	0.000107295
Cellular Processes	Transport and catabolism	Prokaryotic Defense System	restriction system protein [K07448]	-1.24	4.06012e-05
Environmental Information Processing	Membrane transport	ABC transporters	energy-coupling factor transport system permease protein [K16785]	-1.23	0.000902188
Metabolism	Enzyme families	Peptidases	protease I [K05520]	-1.22	0.000605732
Environmental Information Processing	Membrane Transport	ABC transporters	manganese transport system ATP-binding protein [K11603]	-1.2	0.000316081
Cellular Processes	Cellular community - prokaryotes	Biofilm formation - Pseudomonas aeruginosa	AraC family transcriptional regulator, exoenzyme S synthesis regulatory protein ExsA [K20968]	-1.19	2.26811e-07
Genetic Information Processing	Translation	Transfer RNA biogenesis	RNA methyltransferase, TrmH family [K03437]	-1.15	0.000217198
Metabolism	Biosynthesis of Other Secondary Metabolites	Phenylpropanoid biosynthesis	cinnamyl-alcohol dehydrogenase [K00083]	-1.14	1.08703e-07
Metabolism	Biosynthesis of Other Secondary Metabolites	Novobiocin biosynthesis	demethyldecarbamoylnovobiocin O-methyltransferase [K12712]	-1.13	0.000525942
Metabolism	Energy Metabolism	Nitrogen metabolism	nitrate reductase beta subunit [K00371]	-1.13	0.000729738
Environmental Information Processing	Membrane Transport	ABC transporters	putative multiple sugar transport system ATP-binding protein [K10548]	-1.13	0.000155003
Metabolism	Carbohydrate Metabolism	Pentose phosphate pathway	phosphoketolase [K01621]	-1.12	0.000150278
Cellular Processes	Cell motility	Cytoskeleton proteins	cell division topological specificity factor [K03608]	-1.12	1.32732e-07
Environmental Information Processing	Membrane transport	Transporters	glycine betaine transporter [K05020]	-1.12	2.25035e-10
Metabolism	Amino acid metabolism	Glycine, serine and threonine metabolism	N2-acetyl-L-2,4-diaminobutanoate deacetylase [K15784]	-1.12	0.000806477
Metabolism	Carbohydrate Metabolism	Propanoate metabolism	acetoacetate decarboxylase [K01574]	-1.1	1.55466e-08
Metabolism	Energy Metabolism	Nitrogen metabolism	ferredoxin-nitrate reductase [K00367]	-1.09	0.000617309
Unclassified	Poorly characterized	General function prediction only	uncharacterized zinc-type alcohol dehydrogenase-like protein [K13979]	-1.06	2.97129e-12
Metabolism	Carbohydrate metabolism	Starch and sucrose metabolism	(1->4)-alpha-D-glucan 1-alpha-D-glucosylmutase [K06044]	-1.06	0.000200623
Environmental Information Processing	Membrane Transport	ABC transporters	ATP-binding cassette, subfamily C, bacterial [K06148]	-1.06	6.11137e-06
Unclassified	Metabolism	Others	aspartate beta-hydroxylase [K00476]	-1.05	1.1562e-09
Unclassified	Genetic information processing	Replication, recombination and repair proteins	transposase [K07486]	-1.04	0.000142016
Metabolism	Metabolism of cofactors and vitamins	Porphyrin and chlorophyll metabolism	cob(I)alamin adenosyltransferase [K19221]	-1.04	9.23897e-05
Metabolism	Metabolism of terpenoids and polyketides	Biosynthesis of type II polyketide products	8-demethyl-8-(2,3-dimethoxy-alpha-L-rhamnosyl)tetracenomycin-C 4'-O-methyltransferase [K19569]	-1.04	8.44777e-06
Genetic Information Processing	Replication and repair	Chromosome and associated proteins	DNA excision repair protein ERCC-6-like [K20093]	-1.02	0.000843263
Environmental Information Processing	Membrane Transport	ABC transporters	iron complex transport system substrate-binding protein [K02016]	-1.02	0.000432322
Unclassified	Metabolism	Others	PKHD-type hydroxylase [K07336]	-1.01	6.29369e-06
Metabolism	Lipid Metabolism	Glycerolipid metabolism	glycerol dehydrogenase [K00005]	-1	0.000577137
Metabolism	Biosynthesis of Polyketides and Terpenoids	Biosynthesis of siderophore group nonribosomal peptides	yersiniabactin nonribosomal peptide synthetase [K04784]	-0.95	0.000134345
Metabolism	Carbohydrate Metabolism	Glyoxylate and dicarboxylate metabolism	formamidase [K01455]	-0.95	0.000156306
Genetic Information Processing	Translation	Ribosome biogenesis	ribosomal protein S12 methylthiotransferase accessory factor [K09136]	-0.95	3.90163e-06
Unclassified	Poorly characterized	Function unknown	uncharacterized protein [K09781]	-0.95	4.91191e-05
Metabolism	Metabolism of terpenoids and polyketides	Sesquiterpenoid and triterpenoid biosynthesis	dammaradiene synthase [K15810]	-0.94	0.000274562
Metabolism	Amino acid metabolism	Alanine, aspartate and glutamate metabolism	succinate-semialdehyde dehydrogenase [K08324]	-0.94	1.50123e-10
Metabolism	Metabolism of Cofactors and Vitamins	Porphyrin and chlorophyll metabolism	sirohydrochlorin cobaltochelatase [K03795]	-0.94	0.000607541
Environmental Information Processing	Membrane Transport	Bacterial secretion system	type VI secretion system secreted protein Hcp [K11903]	-0.93	0.00014721
Environmental Information Processing	Membrane transport	Transporters	sulfate permease, SulP family [K03321]	-0.93	6.64046e-06
Metabolism	Nucleotide Metabolism	Purine metabolism	2-oxo-4-hydroxy-4-carboxy-5-ureidoimidazoline decarboxylase [K13485]	-0.93	0.000286714
Environmental Information Processing	Membrane Transport	ABC transporters	ATP-binding cassette, subfamily B, bacterial HlyB/CyaB [K11004]	-0.91	0.000286714
Environmental Information Processing	Membrane Transport	ABC transporters	histidine transport system permease protein [K10016]	-0.9	0.00030167
Metabolism	Energy Metabolism	Nitrogen metabolism	L-asparaginase [K01424]	-0.9	0.00065346
Environmental Information Processing	Membrane transport	Transporters	arsenite oxidase large subunit [K08356]	-0.89	1.06374e-05
Environmental Information Processing	Signal Transduction	Two-component system	two-component system, OmpR family, sensor histidine kinase KdpD [K07646]	-0.88	5.24684e-07
Unclassified	Poorly characterized	Function unknown	uncharacterized protein [K07089]	-0.88	0.000102777
Metabolism	Nucleotide metabolism	Purine metabolism	ureidoglycolate amidohydrolase [K18151]	-0.87	2.47783e-05
Metabolism	Amino acid metabolism	Glycine, serine and threonine metabolism	L-2,4-diaminobutyrate transaminase [K15785]	-0.87	0.000102678
Environmental Information Processing	Membrane Transport	ABC transporters	phosphonate transport system substrate-binding protein [K02044]	-0.86	1.44695e-05
Environmental Information Processing	Membrane transport	ABC transporters	phospholipid/cholesterol/gamma-HCH transport system substrate-binding protein [K02067]	-0.86	8.7302e-05
Cellular Processes	Transport and catabolism	Prokaryotic Defense System	CRISPR-associated protein Cas2 [K09951]	-0.85	0.000483051
Metabolism	Carbohydrate Metabolism	Starch and sucrose metabolism	beta-phosphoglucomutase [K01838]	-0.85	0.000474808
Metabolism	Carbohydrate Metabolism	Galactose metabolism	alpha-glucosidase [K01187]	-0.83	2.60364e-06
Environmental Information Processing	Membrane transport	Transporters	choline/glycine/proline betaine transport protein [K02168]	-0.82	2.32297e-09
Metabolism	Carbohydrate metabolism	Starch and sucrose metabolism	maltooligosyltrehalose trehalohydrolase [K01236]	-0.81	0.000525942
Environmental Information Processing	Membrane Transport	ABC transporters	manganese/iron transport system substrate-binding protein [K11604]	-0.81	4.78523e-07
Cellular Processes	Cell motility	Cytoskeleton proteins	septum site-determining protein MinC [K03610]	-0.81	9.44557e-06
Genetic Information Processing	Transcription	Transcription factors	Fur family transcriptional regulator, ferric uptake regulator [K03711]	-0.81	0.000209567
Metabolism	Metabolism of Cofactors and Vitamins	Porphyrin and chlorophyll metabolism	magnesium-protoporphyrin IX monomethyl ester (oxidative) cyclase [K04035]	-0.81	2.4422e-06
Unclassified	Metabolism	Biosynthesis and biodegradation of secondary metabolites	chromate reductase [K19784]	-0.8	3.53522e-05
Metabolism	Energy Metabolism	Nitrogen metabolism	ferredoxin-nitrite reductase [K00366]	-0.78	8.0823e-08
Environmental Information Processing	Membrane transport	Transporters	sodium/proline symporter [K11928]	-0.78	4.89576e-05
Unclassified	Genetic information processing	Translation proteins	deoxyhypusine synthase [K00809]	-0.76	0.000255462
Metabolism	Carbohydrate Metabolism	Inositol phosphate metabolism	inosose dehydratase [K03335]	-0.76	0.000623739
Environmental Information Processing	Membrane Transport	ABC transporters	sn-glycerol 3-phosphate transport system substrate-binding protein [K05813]	-0.75	0.000849357
Metabolism	Carbohydrate Metabolism	Pyruvate metabolism	pyruvate, water dikinase [K01007]	-0.75	5.24684e-07
Metabolism	Nucleotide Metabolism	Pyrimidine metabolism	cytosine deaminase [K01485]	-0.74	2.25769e-05
Genetic Information Processing	Replication and repair	Chromosome and associated proteins	curved DNA-binding protein [K05516]	-0.74	0.000112809
Environmental Information Processing	Membrane transport	Transporters	putative permease [K03548]	-0.73	0.000843995
Metabolism	Energy metabolism	Sulfur metabolism	taurine transport system permease protein [K15552]	-0.73	0.000195529
Metabolism	Energy Metabolism	Sulfur metabolism	sulfite reductase (ferredoxin) [K00392]	-0.73	0.000237625
Metabolism	Metabolism of Cofactors and Vitamins	Nicotinate and nicotinamide metabolism	nicotinate phosphoribosyltransferase [K00763]	-0.73	6.3161e-07
Genetic Information Processing	Transcription	Transcription factors	AraC family transcriptional regulator, L-rhamnose operon transcriptional activator RhaR [K02854]	-0.72	0.000331615
Metabolism	Energy Metabolism	Nitrogen metabolism	carbonic anhydrase [K01673]	-0.72	1.2993e-10
Environmental Information Processing	Membrane Transport	ABC transporters	putrescine transport system substrate-binding protein [K11073]	-0.72	0.000441524
Environmental Information Processing	Membrane transport	Transporters	multidrug efflux pump [K18142]	-0.71	6.54792e-09
Environmental Information Processing	Membrane Transport	ABC transporters	phosphate transport system substrate-binding protein [K02040]	-0.71	0.000102777
Unclassified	Poorly characterized	General function prediction only	putative membrane protein [K08973]	-0.71	4.91191e-05
Environmental Information Processing	Membrane Transport	ABC transporters	sn-glycerol 3-phosphate transport system permease protein [K05815]	-0.7	9.77123e-06
Metabolism	Metabolism of Cofactors and Vitamins	Ubiquinone and other terpenoid-quinone biosynthesis	4-hydroxybenzoate polyprenyltransferase [K03179]	-0.69	6.71446e-05
Metabolism	Enzyme families	Peptidases	prolyl oligopeptidase [K01322]	-0.66	5.24706e-08
Metabolism	Carbohydrate Metabolism	Glycolysis / Gluconeogenesis	fructose-1,6-bisphosphatase II / sedoheptulose-1,7-bisphosphatase [K11532]	-0.65	0.000223578
Metabolism	Metabolism of Cofactors and Vitamins	Porphyrin and chlorophyll metabolism	uroporphyrin-III C-methyltransferase [K02303]	-0.65	8.27424e-05
Metabolism	Glycan biosynthesis and metabolism	Peptidoglycan biosynthesis and degradation proteins	muramoyltetrapeptide carboxypeptidase [K01297]	-0.64	0.000146218
Unclassified	Metabolism	Amino acid metabolism	glutathionyl-hydroquinone reductase [K07393]	-0.62	3.36451e-09
Environmental Information Processing	Membrane Transport	ABC transporters	glycine betaine/proline transport system permease protein [K02001]	-0.62	4.89576e-05
Unclassified	Cellular processes and signaling	Transport	solute:Na+ symporter, SSS family [K03307]	-0.61	8.7302e-05
Environmental Information Processing	Membrane transport	Transporters	multidrug efflux pump [K18899]	-0.61	0.000832408
Metabolism	Amino Acid Metabolism	Histidine metabolism	ATP phosphoribosyltransferase regulatory subunit [K02502]	-0.59	0.000588221
Unclassified	Genetic information processing	Protein folding and associated processing	ATP-dependent Clp protease adaptor protein ClpS [K06891]	-0.58	9.65172e-08
Metabolism	Amino acid metabolism	Phenylalanine metabolism	ring-1,2-phenylacetyl-CoA epoxidase subunit PaaE [K02613]	-0.57	0.000688606
Metabolism	Carbohydrate Metabolism	Starch and sucrose metabolism	1,4-alpha-glucan branching enzyme [K00700]	-0.54	6.87647e-05
Metabolism	Metabolism of Cofactors and Vitamins	Pantothenate and CoA biosynthesis	2-dehydropantoate 2-reductase [K00077]	-0.53	0.0005908
Unclassified	Cellular processes and signaling	Signal transduction mechanisms	isocitrate dehydrogenase kinase/phosphatase [K00906]	-0.51	0.000974161
Genetic Information Processing	Folding, sorting and degradation	Chaperones and folding catalysts	monothiol glutaredoxin [K07390]	-0.5	0.000156306
Environmental Information Processing	Membrane transport	Transporters	potassium-dependent mechanosensitive channel [K05802]	-0.5	0.000571317
Environmental Information Processing	Membrane Transport	ABC transporters	phosphate transport system permease protein [K02037]	-0.45	4.55229e-08
Metabolism	Energy Metabolism	Oxidative phosphorylation	NADH dehydrogenase [K03885]	-0.45	0.000911003
Genetic Information Processing	Translation	Ribosome biogenesis	ribosomal protein S6--L-glutamate ligase [K05844]	-0.44	1.25972e-05
Environmental Information Processing	Membrane Transport	ABC transporters	phosphate transport system permease protein [K02038]	-0.44	4.17751e-05
Cellular Processes	Cell motility	Bacterial motility proteins	leader peptidase (prepilin peptidase) / N-methyltransferase [K02654]	-0.41	0.000388
Metabolism	Metabolism of Cofactors and Vitamins	Biotin metabolism	8-amino-7-oxononanoate synthase [K00652]	-0.39	0.000163624
Environmental Information Processing	Membrane Transport	ABC transporters	phosphate transport system ATP-binding protein [K02036]	-0.39	0.000385159
Metabolism	Energy Metabolism	Oxidative phosphorylation	F-type H+-transporting ATPase subunit a [K02108]	-0.38	0.000720674
Metabolism	Biosynthesis of Polyketides and Terpenoids	Polyketide sugar unit biosynthesis	dTDP-4-dehydrorhamnose 3,5-epimerase [K01790]	-0.36	0.000680821
Metabolism	Carbohydrate Metabolism	Glycolysis / Gluconeogenesis	pyruvate kinase [K00873]	-0.34	3.53522e-05
Metabolism	Enzyme families	Peptidases	carboxyl-terminal processing protease [K03797]	-0.29	0.000254503
Metabolism	Enzyme families	Peptidases	protease IV [K04773]	-0.26	0.000484199
Unclassified	Genetic information processing	Protein folding and associated processing	hydrogenase maturation protein HypF [K04656]	0.42	4.94547e-05
Metabolism	Lipid Metabolism	Fatty acid degradation	long-chain-acyl-CoA dehydrogenase [K00255]	0.53	0.00062123
Environmental Information Processing	Membrane transport	Transporters	aquaporin NIP [K09874]	0.62	2.65761e-06
Metabolism	Carbohydrate Metabolism	Galactose metabolism	beta-galactosidase [K01190]	0.67	0.000191168
Metabolism	Carbohydrate Metabolism	Galactose metabolism	galactokinase [K00849]	0.72	1.69473e-07
Unclassified	Metabolism	Others	retinol dehydrogenase 14 [K11162]	0.74	2.75214e-09
Metabolism	Energy metabolism	Sulfur metabolism	thiosulfate reductase / polysulfide reductase chain A [K08352]	0.74	0.000329745
Unclassified	Cellular processes and signaling	Transport	bile acid:Na+ symporter, BASS family [K03453]	0.75	0.000117095
Metabolism	Amino Acid Metabolism	Arginine and proline metabolism	agmatine deiminase [K10536]	0.75	8.7302e-05
Unclassified	Metabolism	Energy metabolism	NADP-reducing hydrogenase subunit HndD [K18332]	0.79	9.23897e-05
Metabolism	Enzyme families	Peptidases	lysyl endopeptidase [K01337]	0.81	0.000832408
Unclassified	Metabolism	Energy metabolism	[NiFe] hydrogenase diaphorase moiety large subunit [K18005]	0.89	0.000657344
Cellular Processes	Cell Motility	Bacterial chemotaxis	chemotaxis protein CheD [K03411]	0.91	0.000142016
Metabolism	Carbohydrate Metabolism	Starch and sucrose metabolism	glycogen(starch) synthase [K00693]	0.95	4.23264e-05
Metabolism	Glycan Biosynthesis and Metabolism	Other glycan degradation	alpha-L-fucosidase [K01206]	0.96	0.000228041
Unclassified	Poorly characterized	Function unknown	uncharacterized protein [K09990]	0.97	0.000982954
Metabolism	Energy metabolism	Carbon fixation pathways in prokaryotes	4-hydroxybutyryl-CoA dehydratase / vinylacetyl-CoA-Delta-isomerase [K14534]	0.99	8.08321e-05
Metabolism	Carbohydrate Metabolism	Fructose and mannose metabolism	fructan beta-fructosidase [K03332]	1.02	3.04056e-09
Metabolism	Enzyme families	Peptidases	tripeptidyl-peptidase II [K01280]	1.09	1.63287e-07
Unclassified	Cellular processes and signaling	Membrane and intracellular structural molecules	inner membrane protein [K06143]	1.12	3.44456e-05
Genetic Information Processing	Replication and Repair	Base excision repair	AraC family transcriptional regulator, regulatory protein of adaptative response / DNA-3-methyladenine glycosylase II [K13529]	1.16	9.23897e-05
Unclassified	Metabolism	Energy metabolism	sulfide dehydrogenase subunit alpha [K20202]	1.18	6.11137e-06
Metabolism	Lipid Metabolism	Primary bile acid biosynthesis	solute carrier family 27 (fatty acid transporter), member 5 [K08748]	1.21	0.000128725
Environmental Information Processing	Signal Transduction	Two-component system	methyl-accepting chemotaxis protein IV, peptide sensor receptor [K05877]	1.23	0.000982954
Unclassified	Metabolism	Others	dehydrogenase/reductase SDR family member 12 [K11168]	1.28	0.000294624
Metabolism	Metabolism of terpenoids and polyketides	Monoterpenoid biosynthesis	linalool 8-monooxygenase [K05525]	1.32	0.000102777
Metabolism	Carbohydrate Metabolism	Ascorbate and aldarate metabolism	L-gulonolactone oxidase [K00103]	1.33	0.000130979
Cellular Processes	Transport and Catabolism	Peroxisome	solute carrier family 27 (fatty acid transporter), member 2 [K08746]	1.36	5.90593e-05
Environmental Information Processing	Membrane transport	Transporters	peptide/bleomycin uptake transporter [K17938]	1.39	2.57359e-06
Environmental Information Processing	Membrane transport	Transporters	inner membrane transporter RhtA [K11939]	1.4	0.000932504
Unclassified	Metabolism	Energy metabolism	thiosulfate dehydrogenase [K19713]	1.44	0.000155003
Metabolism	Xenobiotics biodegradation and metabolism	Chloroalkane and chloroalkene degradation	acetylene hydratase [K20625]	1.45	1.39418e-06
Metabolism	Carbohydrate Metabolism	Pentose and glucuronate interconversions	L-xylulokinase [K00880]	1.48	4.91191e-05
Metabolism	Metabolism of Cofactors and Vitamins	Pantothenate and CoA biosynthesis	type II pantothenate kinase [K09680]	1.48	0.000107295
Metabolism	Enzyme families	KEGG modules in global maps only	pentalenolactone D synthase [K18091]	1.52	2.83784e-07
Environmental Information Processing	Signal transduction	Two-component system	LysR family transcriptional regulator, virulence genes transcriptional regulator [K19624]	1.66	0.000339536
Metabolism	Carbohydrate Metabolism	Glycolysis / Gluconeogenesis	aldehyde:ferredoxin oxidoreductase [K03738]	1.7	0.000316081
Metabolism	Lipid metabolism	Secondary bile acid biosynthesis	bile acid-coenzyme A ligase [K15868]	1.72	0.000118157
Unclassified	Poorly characterized	Function unknown	uncharacterized protein [K09974]	1.79	3.54255e-06
Metabolism	Glycan biosynthesis and metabolism	Other glycan degradation	alpha-L-fucosidase 2 [K15923]	1.82	3.78138e-08
Human Diseases	Immune System Diseases	Systemic lupus erythematosus	60 kDa SS-A/Ro ribonucleoprotein [K11089]	1.87	2.19227e-10
Metabolism	Glycan biosynthesis and metabolism	Peptidoglycan biosynthesis and degradation proteins	peptidoglycan LD-endopeptidase CwlK [K17733]	1.94	5.41741e-06
Genetic Information Processing	Translation	Mitochondrial biogenesis	mitochondrial chaperone BCS1 [K08900]	1.97	4.77269e-05
Genetic Information Processing	Translation	Mitochondrial biogenesis	DNA-directed RNA polymerase, mitochondrial [K10908]	1.99	2.90738e-06
Genetic Information Processing	Translation	Transfer RNA biogenesis	tRNA (cytosine38-C5)-methyltransferase [K15336]	2.18	4.91191e-05
Unclassified	Poorly characterized	General function prediction only	modulator of drug activity B [K03923]	2.4	0.000902088
Metabolism	Metabolism of terpenoids and polyketides	Biosynthesis of type II polyketide products	SAM-dependent hydroxylase [K15958]	2.4	0.000921439
Unclassified	Poorly characterized	Function unknown	uncharacterized protein [K09925]	2.66	0.000670319
Environmental Information Processing	Membrane transport	Transporters	cellulose synthase operon protein B [K20541]	2.69	0.000116118
Metabolism	Carbohydrate Metabolism	Butanoate metabolism	maleate isomerase [K01799]	3.07	0.0002422
Genetic Information Processing	Transcription	Transcription factors	IclR family transcriptional regulator, mhp operon transcriptional activator [K05818]	3.25	2.57359e-06
Cellular Processes	Transport and Catabolism	Peroxisome	carnitine O-acetyltransferase [K00624]	3.28	6.3191e-05
Unclassified	Metabolism	Biosynthesis and biodegradation of secondary metabolites	phenolic acid decarboxylase [K13727]	4.09	5.96055e-06
Unclassified	Metabolism	Glycan biosynthesis and metabolism	beta-porphyranase [K20830]	4.28	0.000982714

## Sheet: Nonlithiyfing vs. Pustular
Table S1. Differentially abundant genes derived from pairwise comparisons of metagenomes
Level_1	Level_2	Level_3	Level_4	log2FoldChange	p-value (adjusted)
Metabolism	Energy Metabolism	Methane metabolism	methanol---5-hydroxybenzimidazolylcobamide Co-methyltransferase [K04480]	-4.09	3.66668e-10
Unclassified	Poorly characterized	Function unknown	uncharacterized protein [K09779]	-3	0.000104224
Metabolism	Enzyme families	Cytochrome P731	fatty-acid peroxygenase [K15629]	-2.98	0.000494107
Unclassified	Metabolism	Energy metabolism	molybdenum storage protein [K00947]	-2.28	4.47386e-05
Genetic Information Processing	Folding, sorting and degradation	Ubiquitin system	F-box protein 11 [K10297]	-1.84	2.50197e-07
Genetic Information Processing	Replication and repair	DNA repair and recombination proteins	DNA helicase IV [K03658]	-1.68	0.000272509
Metabolism	Energy Metabolism	Oxidative phosphorylation	NADH-quinone oxidoreductase subunit C/D [K13378]	-1.65	1.512e-08
Metabolism	Carbohydrate Metabolism	Starch and sucrose metabolism	beta-phosphoglucomutase [K01838]	-1.38	7.10815e-09
Metabolism	Carbohydrate Metabolism	Propanoate metabolism	acetoacetate decarboxylase [K01574]	-1.33	8.60977e-11
Metabolism	Glycan biosynthesis and metabolism	Peptidoglycan biosynthesis and degradation proteins	peptidoglycan DL-endopeptidase CwlS [K19220]	-1.3	0.00075646
Metabolism	Carbohydrate Metabolism	Amino sugar and nucleotide sugar metabolism	CDP-6-deoxy-D-xylo-4-hexulose-3-dehydrase [K12452]	-1.27	8.58177e-08
Unclassified	Poorly characterized	General function prediction only	putative phosphoribosyl transferase [K07100]	-1.13	0.000272509
Environmental Information Processing	Membrane transport	Transporters	formate transporter [K06212]	-1.11	0.000264666
Metabolism	Carbohydrate Metabolism	Fructose and mannose metabolism	L-rhamnose isomerase [K01813]	-1.1	0.000184236
Metabolism	Metabolism of terpenoids and polyketides	Biosynthesis of type II polyketide products	8-demethyl-8-(2,3-dimethoxy-alpha-L-rhamnosyl)tetracenomycin-C 4'-O-methyltransferase [K19569]	-1.02	6.36898e-05
Genetic Information Processing	Replication and repair	Chromosome and associated proteins	LysR family transcriptional regulator, chromosome initiation inhibitor [K05596]	-0.92	6.36898e-05
Unclassified	Cellular processes and signaling	Membrane and intracellular structural molecules	poly-gamma-glutamate synthesis protein (capsule biosynthesis protein) [K07282]	-0.88	6.36898e-05
Environmental Information Processing	Membrane transport	Transporters	glycine betaine transporter [K05020]	-0.74	0.000479192
Metabolism	Metabolism of Cofactors and Vitamins	Folate biosynthesis	para-aminobenzoate synthetase [K13950]	-0.68	2.19832e-05
Metabolism	Xenobiotics Biodegradation and Metabolism	Chlorocyclohexane and chlorobenzene degradation	haloalkane dehalogenase [K01563]	0.52	9.27667e-05
Unclassified	Poorly characterized	Function unknown	uncharacterized protein [K06915]	0.53	0.000727776
Metabolism	Lipid metabolism	Lipid biosynthesis proteins	phthiocerol/phenolphthiocerol synthesis type-I polyketide synthase E [K12444]	0.6	0.000177532
Environmental Information Processing	Membrane Transport	ABC transporters	manganese/iron transport system substrate-binding protein [K11604]	0.63	0.000300706
Organismal Systems	Endocrine System	Insulin signaling pathway	flotillin [K07192]	0.72	0.000724678
Unclassified	Genetic information processing	Replication, recombination and repair proteins	putative N6-adenine-specific DNA methylase [K07444]	0.75	9.62979e-05
Unclassified	Cellular processes and signaling	Inorganic ion transport and metabolism	putative flavoprotein involved in K+ transport [K07222]	0.9	0.000205392
Unclassified	Metabolism	Carbohydrate metabolism	endo-1,4-beta-xylanase [K01181]	0.94	9.04771e-05
Environmental Information Processing	Membrane transport	Transporters	large conductance mechanosensitive channel [K03282]	1.03	6.36898e-05
Metabolism	Carbohydrate Metabolism	Fructose and mannose metabolism	mannitol 2-dehydrogenase [K00045]	1.14	8.11664e-07
Unclassified	Poorly characterized	Function unknown	uncharacterized protein [K09984]	1.32	6.36898e-05
Unclassified	Poorly characterized	Function unknown	uncharacterized protein [K07123]	1.86	1.38325e-07
Metabolism	Glycan biosynthesis and metabolism	Glycosyltransferases	rhamnosyltransferase [K12992]	1.87	0.000139839
Human Diseases	Infectious Diseases	Vibrio cholerae pathogenic cycle	autoinducer 2-binding periplasmic protein LuxP [K10910]	2.19	0.000176697
Environmental Information Processing	Membrane transport	Transporters	inner membrane transporter RhtA [K11939]	2.34	2.16126e-09
Human Diseases	Drug resistance	Antimicrobial resistance genes	chloramphenicol 3-O phosphotransferase [K18554]	2.35	2.19832e-05
Environmental Information Processing	Membrane transport	Transporters	probable blue pigment (indigoidine) exporter [K15269]	4.02	7.10815e-09

## Sheet: Colloform vs. Smooth
Table S1. Differentially abundant genes derived from pairwise comparisons of metagenomes
Level_1	Level_2	Level_3	Level_4	log2FoldChange	p-value (adjusted)
Unclassified	Metabolism	Glycan biosynthesis and metabolism	1,2-beta-oligoglucan phosphorylase [K21298]	-2.08	0.0292636
Cellular Processes	Cellular community - prokaryotes	Quorum sensing	acyl homoserine lactone synthase [K13060]	2.06	0.0010447
Environmental Information Processing	Membrane transport	Transporters	periplasmic iron binding protein [K07230]	2.59	0.0292636
Human Diseases	Drug resistance	Antimicrobial resistance genes	aminoglycoside 3'-phosphotransferase I [K19272]	3.42	0.00172693

## Sheet: Pustular vs. Smooth
Table S1. Differentially abundant genes derived from pairwise comparisons of metagenomes
Level_1	Level_2	Level_3	Level_4	log2FoldChange	p-value (adjusted)
Genetic Information Processing	Translation	Mitochondrial biogenesis	mitochondrial genome maintenance exonuclease 1 [K19465]	-5.73	5.36738e-09
Metabolism	Enzyme families	Peptidases	alkaline phosphatase isozyme conversion protein [K09612]	-4.86	1.39046e-06
Unclassified	Genetic information processing	Replication, recombination and repair proteins	UV DNA damage endonuclease [K13281]	-4.5	0.000975655
Unclassified	Genetic information processing	Replication, recombination and repair proteins	spore photoproduct lyase [K03716]	-4.39	4.33971e-07
Metabolism	Energy Metabolism	Photosynthesis	photosystem I 4.8kDa protein [K02702]	-3.6	6.03803e-07
Metabolism	Energy Metabolism	Photosynthesis	photosystem II oxygen-evolving enhancer protein 2 [K02717]	-3.57	0.000130176
Cellular Processes	Transport and catabolism	Prokaryotic Defense System	CRISPR-associated protein Csx3 [K19144]	-3.46	4.35436e-05
Metabolism	Energy Metabolism	Photosynthesis - antenna proteins	CpeT protein [K05383]	-3.44	0.00016732
Environmental Information Processing	Signal Transduction	Two-component system	K+-transporting ATPase ATPase C chain [K01548]	-3.41	1.07252e-08
Environmental Information Processing	Signal Transduction	Two-component system	K+-transporting ATPase ATPase A chain [K01546]	-3.22	8.49241e-09
Unclassified	Genetic information processing	Replication, recombination and repair proteins	type 1 fimbriae regulatory protein FimE [K07358]	-3.22	6.00599e-11
Unclassified	Genetic information processing	Replication, recombination and repair proteins	type 1 fimbriae regulatory protein FimB [K07357]	-3.17	1.49035e-16
Metabolism	Energy Metabolism	Photosynthesis	photosystem I subunit XII [K02700]	-3.15	1.12475e-06
Metabolism	Energy Metabolism	Photosynthesis	photosystem II PsbY protein [K02723]	-3.08	9.03722e-05
Human Diseases	Drug resistance	Antimicrobial resistance genes	chloramphenicol 3-O phosphotransferase [K18554]	-2.97	3.9048e-09
Environmental Information Processing	Membrane Transport	ABC transporters	manganese transport system permease protein [K11602]	-2.96	1.40787e-10
Genetic Information Processing	Translation	Ribosome biogenesis	ribonuclease III family protein [K11145]	-2.91	2.56051e-12
Metabolism	Amino Acid Metabolism	Alanine, aspartate and glutamate metabolism	aspartoacylase [K01437]	-2.9	0.00016732
Metabolism	Metabolism of Cofactors and Vitamins	Porphyrin and chlorophyll metabolism	15,16-dihydrobiliverdin:ferredoxin oxidoreductase [K05369]	-2.87	0.000774192
Metabolism	Energy Metabolism	Photosynthesis	photosystem II P680 reaction center D1 protein [K02703]	-2.85	2.57567e-05
Metabolism	Energy Metabolism	Photosynthesis	photosystem II Psb27 protein [K08902]	-2.84	3.85835e-13
Metabolism	Metabolism of terpenoids and polyketides	Carotenoid biosynthesis	beta-carotene isomerase [K17911]	-2.82	1.51876e-06
Unclassified	Metabolism	Others	glucosylglycerol 3-phosphatase [K05978]	-2.81	0.000204676
Environmental Information Processing	Membrane transport	Transporters	MFS transporter, ACS family, D-galactonate transporter [K08194]	-2.77	1.47489e-06
Metabolism	Energy Metabolism	Photosynthesis	photosystem II PsbT protein [K02718]	-2.73	3.27115e-06
Metabolism	Energy Metabolism	Photosynthesis	photosystem II oxygen-evolving enhancer protein 1 [K02716]	-2.72	2.54398e-08
Environmental Information Processing	Membrane transport	Transporters	xanthine permease XanQ [K16346]	-2.72	9.54499e-09
Metabolism	Energy Metabolism	Photosynthesis	cytochrome c6 [K08906]	-2.7	6.47455e-06
Metabolism	Energy metabolism	Photosynthesis - antenna proteins	ATP synthase protein I [K02116]	-2.69	3.62996e-06
Metabolism	Glycan biosynthesis and metabolism	Other glycan degradation	non-lysosomal glucosylceramidase [K17108]	-2.68	3.01324e-10
Metabolism	Energy Metabolism	Photosynthesis	photosystem II PsbJ protein [K02711]	-2.65	9.3214e-06
Metabolism	Nucleotide metabolism	Purine metabolism	FAD-dependent urate hydroxylase [K16839]	-2.64	1.95519e-16
Genetic Information Processing	Transcription	Transcription machinery	RNA polymerase sporulation-specific sigma factor [K03091]	-2.64	0.000664255
Metabolism	Energy Metabolism	Photosynthesis	photosystem II PsbI protein [K02710]	-2.62	2.02533e-05
Metabolism	Energy Metabolism	Photosynthesis	photosystem I subunit III [K02694]	-2.59	1.42599e-06
Unclassified	Genetic information processing	Replication, recombination and repair proteins	insertion element IS1 protein InsB [K07480]	-2.57	6.34449e-06
Metabolism	Energy Metabolism	Photosynthesis	photosystem I subunit X [K02698]	-2.56	1.66754e-07
Genetic Information Processing	Transcription	Transcription machinery	transcription factor C subunit 7 [K15206]	-2.55	0.000245214
Metabolism	Energy Metabolism	Photosynthesis	photosystem II PsbX protein [K02722]	-2.54	0.000258698
Metabolism	Nucleotide Metabolism	Purine metabolism	xanthine dehydrogenase YagS FAD-binding subunit [K11178]	-2.54	4.25326e-17
Metabolism	Energy Metabolism	Methane metabolism	catalase [K03781]	-2.49	3.02418e-05
Cellular Processes	Transport and catabolism	Prokaryotic Defense System	toxin YoeB [K19158]	-2.46	1.02008e-06
Metabolism	Metabolism of Cofactors and Vitamins	Porphyrin and chlorophyll metabolism	phycocyanobilin:ferredoxin oxidoreductase [K05371]	-2.45	8.41888e-08
Metabolism	Energy Metabolism	Photosynthesis	photosystem I subunit II [K02692]	-2.41	1.73625e-06
Environmental Information Processing	Membrane transport	Transporters	xanthine permease XanP [K16345]	-2.41	4.88351e-12
Unclassified	Metabolism	Glycan biosynthesis and metabolism	1,2-beta-oligoglucan phosphorylase [K21298]	-2.41	2.65704e-05
Unclassified	Metabolism	Metabolism of cofactors and vitamins	phytol kinase [K18678]	-2.39	9.98193e-08
Unclassified	Poorly characterized	General function prediction only	PsbN protein [K02715]	-2.39	2.9074e-05
Metabolism	Energy Metabolism	Oxidative phosphorylation	NAD(P)H-quinone oxidoreductase subunit L [K05583]	-2.35	8.21042e-05
Metabolism	Energy Metabolism	Photosynthesis - antenna proteins	allophycocyanin alpha subunit [K02092]	-2.34	1.62974e-05
Genetic Information Processing	Translation	Ribosome	30S ribosomal protein 3 [K19032]	-2.32	0.000282391
Unclassified	Metabolism	Carbohydrate metabolism	carbon dioxide concentrating mechanism protein CcmO [K08700]	-2.31	1.94552e-09
Unclassified	Cellular processes and signaling	Inorganic ion transport and metabolism	nickel superoxide dismutase [K00518]	-2.31	6.91416e-06
Unclassified	Metabolism	Amino acid metabolism	glyoxylase I family protein [K08234]	-2.3	4.85603e-05
Environmental Information Processing	Signal Transduction	Calcium signaling pathway	phosphorylase kinase alpha/beta subunit [K07190]	-2.29	1.24482e-06
Genetic Information Processing	Translation	Transfer RNA biogenesis	tRNA (guanine26-N2/guanine27-N2)-dimethyltransferase [K00555]	-2.27	1.80055e-06
Metabolism	Metabolism of Cofactors and Vitamins	Ubiquinone and other terpenoid-quinone biosynthesis	tocopherol cyclase [K09834]	-2.26	2.23438e-07
Metabolism	Energy Metabolism	Photosynthesis - antenna proteins	phycobilisome core-membrane linker protein [K02096]	-2.26	3.34003e-05
Metabolism	Energy Metabolism	Photosynthesis	photosystem I subunit XI [K02699]	-2.25	0.000101662
Metabolism	Energy Metabolism	Photosynthesis - antenna proteins	phycocyanobilin lyase beta subunit [K02289]	-2.24	1.27684e-09
Genetic Information Processing	Replication and repair	Chromosome and associated proteins	cell division inhibitor SepF [K09772]	-2.24	2.27237e-08
Metabolism	Energy Metabolism	Oxidative phosphorylation	NAD(P)H-quinone oxidoreductase subunit M [K05584]	-2.24	0.000465341
Metabolism	Carbohydrate metabolism	Starch and sucrose metabolism	NA [K05992]	-2.23	2.302e-06
Environmental Information Processing	Membrane transport	Transporters	probable blue pigment (indigoidine) exporter [K15269]	-2.23	1.52481e-05
Metabolism	Energy Metabolism	Photosynthesis	photosystem I subunit IV [K02693]	-2.23	0.000465341
Metabolism	Energy Metabolism	Photosynthesis	photosystem II 13kDa protein [K08903]	-2.23	8.49241e-09
Metabolism	Energy Metabolism	Oxidative phosphorylation	NAD(P)H-quinone oxidoreductase subunit 6 [K05578]	-2.22	6.49489e-05
Environmental Information Processing	Membrane Transport	ABC transporters	putative ATP-binding cassette transporter [K02471]	-2.21	8.11279e-09
Metabolism	Energy Metabolism	Oxidative phosphorylation	NAD(P)H-quinone oxidoreductase subunit H [K05579]	-2.2	4.06432e-08
Metabolism	Energy Metabolism	Photosynthesis - antenna proteins	phycobilisome rod-core linker protein [K02290]	-2.2	1.98093e-05
Metabolism	Carbohydrate Metabolism	Amino sugar and nucleotide sugar metabolism	N-acylglucosamine-6-phosphate 2-epimerase [K01788]	-2.19	1.21944e-09
Metabolism	Energy Metabolism	Oxidative phosphorylation	NAD(P)H-quinone oxidoreductase subunit N [K05585]	-2.17	5.68932e-09
Metabolism	Energy Metabolism	Photosynthesis - antenna proteins	phycobilisome core component [K02097]	-2.17	1.11879e-06
Metabolism	Nucleotide Metabolism	Purine metabolism	xanthine dehydrogenase YagR molybdenum-binding subunit [K11177]	-2.16	6.82897e-21
Unclassified	Cellular processes and signaling	Signal transduction mechanisms	circadian clock protein KaiA [K08480]	-2.15	0.000459576
Metabolism	Energy Metabolism	Photosynthesis - antenna proteins	phycocyanin-associated, rod [K02287]	-2.15	7.36055e-05
Metabolism	Enzyme families	Protein phosphatase and associated proteins	ubiquitin-associated and SH3 domain-containing protein [K18993]	-2.14	0.000987354
Unclassified	Poorly characterized	Function unknown	uncharacterized protein [K07123]	-2.12	2.67734e-12
Metabolism	Metabolism of Cofactors and Vitamins	Ubiquinone and other terpenoid-quinone biosynthesis	homogentisate phytyltransferase / homogentisate geranylgeranyltransferase [K09833]	-2.12	7.50832e-08
Metabolism	Biosynthesis of Other Secondary Metabolites	Tropane, piperidine and pyridine alkaloid biosynthesis	homospermidine synthase [K00808]	-2.11	4.30952e-06
Unclassified	Metabolism	Carbohydrate metabolism	carbon dioxide concentrating mechanism protein CcmM [K08698]	-2.08	2.91624e-07
Metabolism	Energy Metabolism	Oxidative phosphorylation	NAD(P)H-quinone oxidoreductase subunit I [K05580]	-2.07	7.83175e-05
Metabolism	Energy Metabolism	Oxidative phosphorylation	NAD(P)H-quinone oxidoreductase subunit 1 [K05572]	-2.05	4.35436e-05
Unclassified	Genetic information processing	Replication, recombination and repair proteins	putative transposase [K07498]	-2.04	1.23235e-07
Genetic Information Processing	Transcription	Transcription machinery	RNA polymerase sigma-B factor [K03090]	-2.03	0.000419833
Unclassified	Genetic information processing	Protein folding and associated processing	cytochrome c biogenesis protein [K07399]	-2.02	4.35436e-05
Environmental Information Processing	Membrane Transport	ABC transporters	manganese transport system ATP-binding protein [K11603]	-2.01	2.49345e-13
Metabolism	Metabolism of terpenoids and polyketides	Carotenoid biosynthesis	zeta-carotene isomerase [K15744]	-2.01	4.88338e-07
Environmental Information Processing	Membrane Transport	ABC transporters	glutamate/aspartate transport system permease protein [K10002]	-1.98	0.000139389
Cellular Processes	Transport and catabolism	Prokaryotic Defense System	antitoxin YefM [K19159]	-1.98	7.36055e-05
Metabolism	Energy Metabolism	Oxidative phosphorylation	NAD(P)H-quinone oxidoreductase subunit 3 [K05574]	-1.97	5.05991e-06
Metabolism	Metabolism of Cofactors and Vitamins	Porphyrin and chlorophyll metabolism	magnesium-protoporphyrin O-methyltransferase [K03428]	-1.95	1.24622e-06
Metabolism	Nucleotide Metabolism	Purine metabolism	urate oxidase [K00365]	-1.94	2.55538e-05
Genetic Information Processing	Translation	Ribosome biogenesis	mitochondrial GTPase 1 [K19828]	-1.94	6.7501e-07
Environmental Information Processing	Membrane Transport	Bacterial secretion system	type IV secretion system protein VirB10 [K03195]	-1.94	0.000968159
Metabolism	Energy Metabolism	Oxidative phosphorylation	NAD(P)H-quinone oxidoreductase subunit K [K05582]	-1.94	0.000366667
Metabolism	Metabolism of Cofactors and Vitamins	Vitamin B6 metabolism	pyridoxine 4-dehydrogenase [K05275]	-1.93	8.05373e-11
Metabolism	Biosynthesis of Polyketides and Terpenoids	Carotenoid biosynthesis	zeta-carotene desaturase [K00514]	-1.91	1.19797e-06
Metabolism	Biosynthesis of Polyketides and Terpenoids	Carotenoid biosynthesis	prolycopene isomerase [K09835]	-1.89	1.92301e-10
Metabolism	Amino Acid Metabolism	Phenylalanine, tyrosine and tryptophan biosynthesis	anthranilate synthase [K13503]	-1.86	3.10267e-06
Metabolism	Nucleotide metabolism	Purine metabolism	urate oxidase / 2-oxo-4-hydroxy-4-carboxy-5-ureidoimidazoline decarboxylase [K16838]	-1.85	0.000707464
Metabolism	Glycan biosynthesis and metabolism	Glycosyltransferases	1,2-diacylglycerol 3-beta-glucosyltransferase [K19003]	-1.83	1.07252e-08
Unclassified	Poorly characterized	Function unknown	uncharacterized protein [K09775]	-1.83	0.000137306
Metabolism	Metabolism of Cofactors and Vitamins	Porphyrin and chlorophyll metabolism	protochlorophyllide reductase [K00218]	-1.81	5.27646e-07
Metabolism	Energy Metabolism	Oxidative phosphorylation	NAD(P)H-quinone oxidoreductase subunit 2 [K05573]	-1.8	6.33517e-06
Environmental Information Processing	Membrane transport	Transporters	solute carrier family 12 (potassium/chloride transporters), member 8 [K14428]	-1.8	3.13324e-06
Metabolism	Enzyme families	Peptidases	cyanophycinase [K13282]	-1.79	1.19732e-09
Environmental Information Processing	Membrane Transport	ABC transporters	bicarbonate transport system substrate-binding protein [K11950]	-1.78	6.47455e-06
Metabolism	Metabolism of cofactors and vitamins	Ubiquinone and other terpenoid-quinone biosynthesis	MPBQ/MSBQ methyltransferase [K18534]	-1.77	1.36234e-05
Metabolism	Metabolism of Cofactors and Vitamins	Porphyrin and chlorophyll metabolism	heme oxygenase [K00510]	-1.77	0.00023984
Metabolism	Metabolism of terpenoids and polyketides	Sesquiterpenoid and triterpenoid biosynthesis	dammaradiene synthase [K15810]	-1.75	6.70615e-17
Unclassified	Metabolism	Carbohydrate metabolism	glucosylglycerol-phosphate synthase [K03692]	-1.75	1.27684e-09
Metabolism	Energy Metabolism	Oxidative phosphorylation	NAD(P)H-quinone oxidoreductase subunit J [K05581]	-1.74	7.36055e-05
Unclassified	Metabolism	Carbohydrate metabolism	carbon dioxide concentrating mechanism protein CcmK [K08696]	-1.74	3.9396e-06
Environmental Information Processing	Membrane transport	ABC transporters	energy-coupling factor transport system permease protein [K16785]	-1.74	1.22019e-08
Metabolism	Carbohydrate metabolism	Amino sugar and nucleotide sugar metabolism	exo-1,4-beta-D-glucosaminidase [K15855]	-1.73	8.70084e-05
Metabolism	Energy Metabolism	Photosynthesis	photosystem II CP43 chlorophyll apoprotein [K02705]	-1.73	0.000725468
Metabolism	Carbohydrate metabolism	Starch and sucrose metabolism	NA [K07024]	-1.72	1.12475e-06
Metabolism	Energy Metabolism	Photosynthesis	photosystem II P680 reaction center D2 protein [K02706]	-1.72	7.9923e-05
Metabolism	Biosynthesis of Other Secondary Metabolites	Isoquinoline alkaloid biosynthesis	morphine 6-dehydrogenase [K03378]	-1.72	0.000528445
Metabolism	Biosynthesis of Polyketides and Terpenoids	Carotenoid biosynthesis	15-cis-phytoene desaturase [K02293]	-1.71	0.000300589
Metabolism	Glycan Biosynthesis and Metabolism	Peptidoglycan biosynthesis	D-alanyl-D-alanine carboxypeptidase [K07260]	-1.7	2.65704e-05
Metabolism	Enzyme families	Protein phosphatase and associated proteins	pseudouridine 5'-phosphatase [K17623]	-1.68	9.6422e-08
Metabolism	Energy Metabolism	Carbon fixation in photosynthetic organisms	phosphoribulokinase [K00855]	-1.67	1.09047e-06
Metabolism	Metabolism of terpenoids and polyketides	Tetracycline biosynthesis	tetracycline 7-halogenase / FADH2 O2-dependent halogenase [K14257]	-1.66	1.68178e-06
Metabolism	Metabolism of Cofactors and Vitamins	Porphyrin and chlorophyll metabolism	threonine-phosphate decarboxylase [K04720]	-1.65	1.81292e-05
Metabolism	Biosynthesis of other secondary metabolites	Acarbose and validamycin biosynthesis	2-epi-5-epi-valiolone synthase [K19969]	-1.65	5.80688e-05
Metabolism	Nucleotide Metabolism	Purine metabolism	xanthine dehydrogenase YagT iron-sulfur-binding subunit [K13483]	-1.64	6.33704e-14
Genetic Information Processing	Replication and repair	DNA repair and recombination proteins	DNA polymerase V [K03503]	-1.64	0.00025065
Environmental Information Processing	Signal Transduction	Two-component system	two-component system, OmpR family, sensor histidine kinase NblS [K07769]	-1.63	1.23329e-05
Unclassified	Poorly characterized	Function unknown	uncharacterized protein [K09118]	-1.61	1.27684e-09
Environmental Information Processing	Signal Transduction	Two-component system	K+-transporting ATPase ATPase B chain [K01547]	-1.61	1.61654e-06
Metabolism	Carbohydrate Metabolism	Fructose and mannose metabolism	mannosyl-3-phosphoglycerate phosphatase [K07026]	-1.6	0.000558028
Unclassified	Metabolism	Metabolism of cofactors and vitamins	all-trans-8'-apo-beta-carotenal 15,15'-oxygenase [K00464]	-1.58	4.74204e-08
Metabolism	Metabolism of Cofactors and Vitamins	Porphyrin and chlorophyll metabolism	uroporphyrinogen-III synthase [K01719]	-1.57	1.23639e-08
Metabolism	Energy Metabolism	Nitrogen metabolism	ferredoxin-nitrate reductase [K00367]	-1.57	2.74027e-09
Metabolism	Amino Acid Metabolism	Phenylalanine, tyrosine and tryptophan biosynthesis	chorismate mutase [K06208]	-1.57	5.63803e-06
Metabolism	Nucleotide Metabolism	Purine metabolism	ATP adenylyltransferase [K00988]	-1.56	6.88653e-06
Genetic Information Processing	Translation	Transfer RNA biogenesis	exoribonuclease II [K01147]	-1.56	3.13383e-08
Unclassified	Cellular processes and signaling	Signal transduction mechanisms	circadian clock protein KaiC [K08482]	-1.55	1.10905e-06
Metabolism	Lipid Metabolism	Glycerolipid metabolism	glycerol dehydrogenase [K00005]	-1.55	7.43479e-11
Unclassified	Metabolism	Carbohydrate metabolism	endo-1,4-beta-xylanase [K01181]	-1.55	9.09194e-16
Genetic Information Processing	Replication and repair	Chromosome and associated proteins	G-protein signaling modulator 2 [K15837]	-1.55	0.000584296
Metabolism	Glycan biosynthesis and metabolism	Glycosyltransferases	succinoglycan biosynthesis protein ExoL [K16558]	-1.54	0.000100449
Unclassified	Metabolism	Carbohydrate metabolism	erythritol kinase (D-erythritol 1-phosphate-forming) [K00862]	-1.52	5.43967e-05
Unclassified	Cellular processes and signaling	Membrane and intracellular structural molecules	cyanophycin synthetase [K03802]	-1.51	1.49035e-16
Metabolism	Energy Metabolism	Methane metabolism	2-phosphosulfolactate phosphatase [K05979]	-1.49	1.9325e-09
Metabolism	Carbohydrate Metabolism	Citrate cycle (TCA cycle)	aconitate hydratase 2 / 2-methylisocitrate dehydratase [K01682]	-1.49	0.000127359
Unclassified	Metabolism	Energy metabolism	NADH:ubiquinone reductase (non-electrogenic) [K17872]	-1.48	0.000129858
Metabolism	Metabolism of Cofactors and Vitamins	Ubiquinone and other terpenoid-quinone biosynthesis	1,4-dihydroxy-2-naphthoyl-CoA hydrolase [K12073]	-1.48	4.38933e-05
Metabolism	Nucleotide Metabolism	Purine metabolism	2-oxo-4-hydroxy-4-carboxy-5-ureidoimidazoline decarboxylase [K13485]	-1.48	2.90715e-12
Environmental Information Processing	Membrane Transport	ABC transporters	manganese/iron transport system substrate-binding protein [K11604]	-1.44	8.83667e-26
Cellular Processes	Transport and catabolism	Prokaryotic Defense System	mRNA interferase MazF [K07171]	-1.44	0.000703451
Metabolism	Carbohydrate Metabolism	Glyoxylate and dicarboxylate metabolism	ribulose-bisphosphate carboxylase small chain [K01602]	-1.42	5.84327e-05
Metabolism	Carbohydrate Metabolism	Glycolysis / Gluconeogenesis	glyceraldehyde-3-phosphate dehydrogenase (NAD(P)) [K00150]	-1.41	0.000959461
Metabolism	Metabolism of Cofactors and Vitamins	Porphyrin and chlorophyll metabolism	sirohydrochlorin cobaltochelatase [K03795]	-1.4	5.83689e-10
Genetic Information Processing	Translation	Transfer RNA biogenesis	RNA methyltransferase, TrmH family [K03437]	-1.39	1.79536e-07
Metabolism	Glycan Biosynthesis and Metabolism	Glycosaminoglycan biosynthesis - heparan sulfate / heparin	[heparan sulfate]-glucosamine 3-sulfotransferase 3 [K07809]	-1.39	0.000323811
Metabolism	Lipid Metabolism	Arachidonic acid metabolism	prostaglandin-endoperoxide synthase 2 [K11987]	-1.39	0.000205099
Human Diseases	Infectious Diseases	Vibrio cholerae pathogenic cycle	RNA polymerase nonessential primary-like sigma factor [K03087]	-1.38	2.15941e-06
Unclassified	Metabolism	Glycan biosynthesis and metabolism	exopolysaccharide production protein ExoQ [K16567]	-1.38	0.00012958
Metabolism	Carbohydrate Metabolism	Glycolysis / Gluconeogenesis	glucose-6-phosphate 1-epimerase [K01792]	-1.38	9.19013e-05
Unclassified	Genetic information processing	Protein folding and associated processing	osmotically inducible protein OsmC [K04063]	-1.38	0.000795662
Unclassified	Metabolism	Carbohydrate metabolism	carbon dioxide concentrating mechanism protein CcmL [K08697]	-1.36	2.35304e-05
Metabolism	Biosynthesis of Polyketides and Terpenoids	Terpenoid backbone biosynthesis	all-trans-nonaprenyl-diphosphate synthase [K05356]	-1.35	5.77793e-06
Metabolism	Metabolism of Cofactors and Vitamins	Porphyrin and chlorophyll metabolism	biliverdin reductase [K00214]	-1.35	0.000804136
Metabolism	Amino Acid Metabolism	Lysine degradation	lysine decarboxylase [K01582]	-1.35	4.29406e-06
Genetic Information Processing	Replication and repair	DNA repair and recombination proteins	DNA polymerase V [K03502]	-1.34	2.10692e-06
Metabolism	Energy Metabolism	Photosynthesis	ferredoxin [K02639]	-1.34	4.2142e-05
Environmental Information Processing	Membrane Transport	ABC transporters	glutamine transport system substrate-binding protein [K10036]	-1.34	2.61504e-05
Environmental Information Processing	Membrane Transport	ABC transporters	manganese/iron transport system permease protein [K11606]	-1.33	5.26476e-05
Environmental Information Processing	Membrane Transport	ABC transporters	ATP-binding cassette, subfamily B, bacterial HlyB/CyaB [K11004]	-1.33	2.00622e-10
Unclassified	Poorly characterized	Function unknown	uncharacterized protein [K07037]	-1.32	0.000492077
Metabolism	Metabolism of Cofactors and Vitamins	Ubiquinone and other terpenoid-quinone biosynthesis	tocopherol O-methyltransferase [K05928]	-1.32	1.38535e-07
Metabolism	Energy metabolism	Methane metabolism	FO synthase subunit 1 [K11780]	-1.3	3.18699e-06
Metabolism	Nucleotide metabolism	Pyrimidine metabolism	ureidoacrylate peracid hydrolase [K09020]	-1.3	6.00599e-11
Metabolism	Nucleotide Metabolism	Pyrimidine metabolism	pantoate ligase / cytidylate kinase [K13799]	-1.3	1.23235e-07
Environmental Information Processing	Membrane transport	Transporters	large conductance mechanosensitive channel [K03282]	-1.3	2.799e-10
Metabolism	Carbohydrate Metabolism	Glyoxylate and dicarboxylate metabolism	formamidase [K01455]	-1.29	1.18985e-09
Metabolism	Xenobiotics Biodegradation and Metabolism	Chlorocyclohexane and chlorobenzene degradation	chloromuconate cycloisomerase [K01860]	-1.29	1.90964e-05
Unclassified	Genetic information processing	Protein folding and associated processing	alkyl hydroperoxide reductase subunit F [K03387]	-1.28	8.67552e-06
Environmental Information Processing	Membrane transport	Transporters	sulfate permease, SulP family [K03321]	-1.27	4.25408e-13
Unclassified	Genetic information processing	Replication, recombination and repair proteins	putative N6-adenine-specific DNA methylase [K07444]	-1.27	4.25326e-17
Metabolism	Nucleotide Metabolism	Purine metabolism	5-hydroxyisourate hydrolase [K07127]	-1.27	2.06566e-09
Metabolism	Energy Metabolism	Photosynthesis - antenna proteins	phycocyanobilin lyase alpha subunit [K02288]	-1.27	9.6131e-07
Unclassified	Cellular processes and signaling	Inorganic ion transport and metabolism	periplasmic glucans biosynthesis protein [K03670]	-1.27	6.56328e-06
Environmental Information Processing	Membrane transport	Transporters	putative MFS transporter, AGZA family, xanthine/uracil permease [K06901]	-1.26	2.14543e-08
Cellular Processes	Cell motility	Cytoskeleton proteins	septum site-determining protein MinC [K03610]	-1.25	8.17874e-16
Metabolism	Energy Metabolism	Sulfur metabolism	sulfite reductase (ferredoxin) [K00392]	-1.24	2.40477e-14
Metabolism	Glycan biosynthesis and metabolism	Peptidoglycan biosynthesis and degradation proteins	muramoyltetrapeptide carboxypeptidase [K01297]	-1.23	1.5948e-19
Environmental Information Processing	Membrane Transport	ABC transporters	alpha-glucoside transport system substrate-binding protein [K10232]	-1.22	9.01023e-06
Metabolism	Nucleotide Metabolism	Purine metabolism	phosphoribosylglycinamide formyltransferase 2 [K08289]	-1.21	1.49297e-07
Metabolism	Carbohydrate Metabolism	Pentose phosphate pathway	gluconokinase [K00851]	-1.21	6.67164e-06
Metabolism	Metabolism of cofactors and vitamins	Porphyrin and chlorophyll metabolism	cob(I)alamin adenosyltransferase [K19221]	-1.2	1.23235e-07
Metabolism	Carbohydrate Metabolism	Starch and sucrose metabolism	cellulose synthase (UDP-forming) [K00694]	-1.17	4.35436e-05
Environmental Information Processing	Membrane transport	Transporters	solute carrier family 30 (zinc transporter), member 9 [K14696]	-1.16	0.000987578
Metabolism	Nucleotide Metabolism	Pyrimidine metabolism	cytosine deaminase [K01485]	-1.15	1.96002e-15
Cellular Processes	Transport and Catabolism	Peroxisome	superoxide dismutase, Cu-Zn family [K04565]	-1.15	0.000794927
Metabolism	Metabolism of Cofactors and Vitamins	Porphyrin and chlorophyll metabolism	uroporphyrin-III C-methyltransferase [K02303]	-1.15	4.11884e-17
Metabolism	Energy Metabolism	Oxidative phosphorylation	NAD(P)H-quinone oxidoreductase subunit 5 [K05577]	-1.15	1.81259e-05
Unclassified	Metabolism	Lipid metabolism	palmitoyl-[glycerolipid] 7-desaturase [K20416]	-1.14	8.18029e-05
Metabolism	Carbohydrate Metabolism	Pentose phosphate pathway	phosphoketolase [K01621]	-1.13	1.23555e-05
Metabolism	Xenobiotics Biodegradation and Metabolism	Toluene degradation	p-hydroxybenzoate 3-monooxygenase [K00481]	-1.12	0.000419833
Metabolism	Glycan biosynthesis and metabolism	Glycosyltransferases	succinoglycan biosynthesis protein ExoA [K16557]	-1.12	9.31541e-05
Environmental Information Processing	Membrane Transport	ABC transporters	ATP-binding cassette, subfamily C, bacterial [K06148]	-1.12	8.30479e-08
Environmental Information Processing	Membrane transport	Transporters	multiple sugar transport system substrate-binding protein [K02027]	-1.11	8.57335e-05
Metabolism	Metabolism of Cofactors and Vitamins	Porphyrin and chlorophyll metabolism	cobalt-precorrin-6B (C15)-methyltransferase [K02191]	-1.1	5.77793e-06
Unclassified	Cellular processes and signaling	Signal transduction mechanisms	cyclic-di-GMP-binding biofilm dispersal mediator protein [K19336]	-1.09	0.000270014
Unclassified	Metabolism	Nucleotide metabolism	8-oxoguanine deaminase [K18456]	-1.08	5.16758e-05
Cellular Processes	Cell motility	Cytoskeleton proteins	cell division topological specificity factor [K03608]	-1.07	5.8297e-08
Metabolism	Biosynthesis of Polyketides and Terpenoids	Biosynthesis of siderophore group nonribosomal peptides	yersiniabactin nonribosomal peptide synthetase [K04784]	-1.06	1.42599e-06
Unclassified	Metabolism	Others	phosphohistidine phosphatase [K08296]	-1.05	4.35436e-05
Metabolism	Metabolism of Cofactors and Vitamins	Ubiquinone and other terpenoid-quinone biosynthesis	4-hydroxybenzoate polyprenyltransferase [K03179]	-1.05	6.70164e-13
Metabolism	Carbohydrate Metabolism	Amino sugar and nucleotide sugar metabolism	N-acylglucosamine 2-epimerase [K01787]	-1.04	3.13134e-05
Genetic Information Processing	Replication and repair	Chromosome and associated proteins	curved DNA-binding protein [K05516]	-1.04	8.05373e-11
Unclassified	Metabolism	Others	bromide peroxidase [K20206]	-1.04	0.000437532
Metabolism	Carbohydrate metabolism	Fructose and mannose metabolism	mannuronan synthase [K19290]	-1.04	1.41551e-05
Cellular Processes	Cellular community - prokaryotes	Biofilm formation - Escherichia coli	diguanylate cyclase [K21084]	-1.02	1.10905e-06
Environmental Information Processing	Membrane Transport	ABC transporters	multiple sugar transport system ATP-binding protein [K10111]	-1.01	0.000287105
Metabolism	Enzyme families	Peptidases	zinc D-Ala-D-Ala dipeptidase [K08641]	-1	4.06972e-05
Cellular Processes	Transport and catabolism	Prokaryotic Defense System	tRNA(fMet)-specific endonuclease VapC [K18828]	-0.98	7.07422e-05
Environmental Information Processing	Membrane transport	Transporters	biopolymer transport protein ExbB [K03561]	-0.98	1.23235e-07
Environmental Information Processing	Membrane transport	Transporters	arsenite-transporting ATPase [K01551]	-0.97	0.000197432
Metabolism	Metabolism of Cofactors and Vitamins	Ubiquinone and other terpenoid-quinone biosynthesis	1,4-dihydroxy-2-naphthoate octaprenyltransferase [K02548]	-0.97	1.85584e-05
Metabolism	Glycan biosynthesis and metabolism	Glycosyltransferases	succinoglycan biosynthesis protein ExoO [K16555]	-0.97	0.000776268
Metabolism	Carbohydrate metabolism	Starch and sucrose metabolism	(1->4)-alpha-D-glucan 1-alpha-D-glucosylmutase [K06044]	-0.96	0.000170288
Metabolism	Metabolism of cofactors and vitamins	Porphyrin and chlorophyll metabolism	3,8-divinyl protochlorophyllide a 8-vinyl-reductase (ferredoxin) [K21231]	-0.96	6.7772e-05
Metabolism	Glycan biosynthesis and metabolism	Glycosyltransferases	heptose III glucuronosyltransferase [K19354]	-0.96	0.000704972
Metabolism	Glycan biosynthesis and metabolism	Glycosyltransferases	colanic acid/amylovoran biosynthesis glycosyltransferase [K16703]	-0.95	7.47902e-07
Metabolism	Xenobiotics biodegradation and metabolism	Atrazine degradation	biuret amidohydrolase [K19837]	-0.94	1.04742e-07
Environmental Information Processing	Membrane Transport	ABC transporters	putative multiple sugar transport system ATP-binding protein [K10548]	-0.94	0.000922751
Metabolism	Amino Acid Metabolism	Phenylalanine, tyrosine and tryptophan biosynthesis	prephenate dehydratase [K04518]	-0.93	9.19538e-06
Metabolism	Metabolism of cofactors and vitamins	Porphyrin and chlorophyll metabolism	cobalamin biosynthesis protein CobW [K02234]	-0.91	1.04585e-05
Unclassified	Poorly characterized	Function unknown	uncharacterized protein [K07019]	-0.91	7.36055e-05
Metabolism	Xenobiotics Biodegradation and Metabolism	Drug metabolism - other enzymes	thiopurine S-methyltransferase [K00569]	-0.9	1.31996e-06
Metabolism	Amino acid metabolism	Glycine, serine and threonine metabolism	aspartate-semialdehyde dehydrogenase [K15786]	-0.9	5.43967e-05
Metabolism	Energy Metabolism	Photosynthesis	ferredoxin--NADP+ reductase [K02641]	-0.89	0.000113378
Cellular Processes	Cellular community - prokaryotes	Biofilm formation - Pseudomonas aeruginosa	AraC family transcriptional regulator, exoenzyme S synthesis regulatory protein ExsA [K20968]	-0.88	0.000115715
Metabolism	Amino Acid Metabolism	Histidine metabolism	phosphoribosyl-ATP pyrophosphohydrolase / phosphoribosyl-AMP cyclohydrolase [K11755]	-0.87	0.000123101
Unclassified	Cellular processes and signaling	Transport	solute:Na+ symporter, SSS family [K03307]	-0.87	3.76725e-11
Metabolism	Nucleotide metabolism	Pyrimidine metabolism	3-hydroxy acid dehydrogenase / malonic semialdehyde reductase [K16066]	-0.86	1.22791e-09
Environmental Information Processing	Membrane transport	Transporters	chromate transporter [K07240]	-0.86	5.05271e-05
Environmental Information Processing	Membrane transport	Transporters	cobalt-zinc-cadmium efflux system protein [K16264]	-0.85	0.000470345
Metabolism	Carbohydrate Metabolism	Glycolysis / Gluconeogenesis	fructose-1,6-bisphosphatase II / sedoheptulose-1,7-bisphosphatase [K11532]	-0.85	1.14421e-08
Environmental Information Processing	Membrane Transport	ABC transporters	putative glutamine transport system ATP-binding protein [K10041]	-0.85	0.000366261
Metabolism	Carbohydrate Metabolism	Amino sugar and nucleotide sugar metabolism	UDP-sulfoquinovose synthase [K06118]	-0.85	0.000156415
Genetic Information Processing	Transcription	Transcription factors	Fur family transcriptional regulator, ferric uptake regulator [K03711]	-0.84	1.23329e-05
Metabolism	Lipid metabolism	Lipid biosynthesis proteins	4-hydroxyphenylalkanoate adenylyltransferase [K21059]	-0.84	0.000380176
Genetic Information Processing	Transcription	Transcription factors	TetR/AcrR family transcriptional regulator, transcriptional repressor for nem operon [K16137]	-0.84	0.000456119
Metabolism	Metabolism of cofactors and vitamins	Pantothenate and CoA biosynthesis	4'-phosphopantetheinyl transferase [K06133]	-0.83	0.0003135
Metabolism	Metabolism of Cofactors and Vitamins	Ubiquinone and other terpenoid-quinone biosynthesis	2-succinyl-5-enolpyruvyl-6-hydroxy-3-cyclohexene-1-carboxylate synthase [K02551]	-0.82	1.08763e-13
Metabolism	Carbohydrate Metabolism	Glyoxylate and dicarboxylate metabolism	ribulose-bisphosphate carboxylase large chain [K01601]	-0.81	1.36345e-05
Environmental Information Processing	Membrane Transport	ABC transporters	alpha-glucoside transport system permease protein [K10234]	-0.81	0.000257588
Unclassified	Genetic information processing	Protein folding and associated processing	urease accessory protein [K03188]	-0.81	1.88973e-05
Unclassified	Genetic information processing	Others	phage shock protein A [K03969]	-0.8	2.24961e-05
Metabolism	Metabolism of Cofactors and Vitamins	Ubiquinone and other terpenoid-quinone biosynthesis	2-octaprenyl-6-methoxyphenol hydroxylase [K03185]	-0.8	1.11396e-07
Unclassified	Poorly characterized	Function unknown	uncharacterized protein [K09781]	-0.8	0.000215016
Metabolism	Glycan Biosynthesis and Metabolism	Other glycan degradation	alpha-mannosidase [K01191]	-0.8	8.84122e-07
Unclassified	Genetic information processing	Protein folding and associated processing	urease accessory protein [K03190]	-0.78	2.81473e-06
Metabolism	Carbohydrate metabolism	Starch and sucrose metabolism	maltooligosyltrehalose trehalohydrolase [K01236]	-0.78	0.000188833
Metabolism	Amino Acid Metabolism	Arginine and proline metabolism	amidase [K01426]	-0.77	5.91963e-05
Environmental Information Processing	Signaling molecules and interaction	Bacterial toxins	putative hemolysin [K03699]	-0.75	0.000690758
Metabolism	Energy Metabolism	Oxidative phosphorylation	NADH dehydrogenase [K03885]	-0.75	1.063e-11
Metabolism	Metabolism of Cofactors and Vitamins	Ubiquinone and other terpenoid-quinone biosynthesis	menaquinone-specific isochorismate synthase [K02552]	-0.74	0.000440649
Metabolism	Carbohydrate Metabolism	Fructose and mannose metabolism	mannitol 2-dehydrogenase [K00045]	-0.74	0.000470345
Metabolism	Amino acid metabolism	Alanine, aspartate and glutamate metabolism	succinate-semialdehyde dehydrogenase [K08324]	-0.74	3.00697e-07
Unclassified	Cellular processes and signaling	Signal transduction mechanisms	cyclic-di-GMP-binding protein [K09767]	-0.73	0.000287105
Metabolism	Carbohydrate Metabolism	Amino sugar and nucleotide sugar metabolism	N-acetylglucosamine-6-phosphate deacetylase [K01443]	-0.72	4.33339e-05
Metabolism	Carbohydrate Metabolism	Inositol phosphate metabolism	inosose dehydratase [K03335]	-0.72	0.000306229
Unclassified	Cellular processes and signaling	Inorganic ion transport and metabolism	putative flavoprotein involved in K+ transport [K07222]	-0.71	0.000570862
Environmental Information Processing	Membrane Transport	ABC transporters	phosphate transport system substrate-binding protein [K02040]	-0.7	1.43236e-05
Unclassified	Cellular processes and signaling	Cell growth	stage II sporulation protein D [K06381]	-0.69	9.27023e-05
Unclassified	Cellular processes and signaling	Transport	monovalent cation:H+ antiporter, CPA1 family [K03316]	-0.69	0.000946657
Metabolism	Energy Metabolism	Nitrogen metabolism	ferredoxin-nitrite reductase [K00366]	-0.69	5.27646e-07
Metabolism	Energy metabolism	Sulfur metabolism	taurine transport system permease protein [K15552]	-0.68	0.000154032
Metabolism	Nucleotide metabolism	Purine metabolism	ureidoglycolate amidohydrolase [K18151]	-0.68	0.000537306
Metabolism	Lipid Metabolism	Sphingolipid metabolism	3-dehydrosphinganine reductase [K04708]	-0.68	1.48138e-06
Environmental Information Processing	Membrane transport	Transporters	arsenite transporter [K03325]	-0.67	0.000292465
Environmental Information Processing	Membrane transport	Transporters	sodium/proline symporter [K11928]	-0.67	0.000129858
Unclassified	Poorly characterized	General function prediction only	uncharacterized zinc-type alcohol dehydrogenase-like protein [K13979]	-0.67	1.66249e-05
Metabolism	Metabolism of Cofactors and Vitamins	Porphyrin and chlorophyll metabolism	cobalt-precorrin-5B (C1)-methyltransferase [K02188]	-0.67	0.000588021
Unclassified	Metabolism	Others	adenosyl-fluoride synthase [K09134]	-0.66	0.000460037
Metabolism	Carbohydrate Metabolism	Amino sugar and nucleotide sugar metabolism	N-acetylmuramic acid 6-phosphate etherase [K07106]	-0.65	4.309e-05
Metabolism	Glycan biosynthesis and metabolism	Glycosyltransferases	N-acetylglucosaminyldiphosphoundecaprenol N-acetyl-beta-D-mannosaminyltransferase [K05946]	-0.65	2.30096e-08
Metabolism	Energy Metabolism	Nitrogen metabolism	glutamate synthase (ferredoxin) [K00284]	-0.65	1.23952e-05
Metabolism	Carbohydrate Metabolism	Glycolysis / Gluconeogenesis	glucokinase [K00845]	-0.65	4.18512e-07
Metabolism	Amino Acid Metabolism	Histidine metabolism	ATP phosphoribosyltransferase regulatory subunit [K02502]	-0.65	1.26282e-05
Environmental Information Processing	Signal Transduction	Two-component system	two-component system, OmpR family, sensor histidine kinase KdpD [K07646]	-0.64	0.000184325
Metabolism	Energy metabolism	Methane metabolism	FO synthase subunit 2 [K11781]	-0.64	5.22269e-05
Genetic Information Processing	Transcription	Transcription factors	Fur family transcriptional regulator, peroxide stress response regulator [K09825]	-0.64	0.000776371
Metabolism	Energy Metabolism	Methane metabolism	S-formylglutathione hydrolase [K01070]	-0.64	0.00039061
Metabolism	Nucleotide Metabolism	Purine metabolism	urease subunit beta [K01429]	-0.62	0.000258698
Metabolism	Nucleotide Metabolism	Purine metabolism	urease subunit gamma [K01430]	-0.62	0.000297772
Metabolism	Metabolism of Cofactors and Vitamins	Porphyrin and chlorophyll metabolism	adenosylcobinamide-GDP ribazoletransferase [K02233]	-0.62	1.2254e-05
Metabolism	Carbohydrate Metabolism	Galactose metabolism	alpha-glucosidase [K01187]	-0.62	0.00016732
Environmental Information Processing	Signal Transduction	Two-component system	two-component system, OmpR family, response regulator MprA [K07669]	-0.62	0.000108985
Metabolism	Carbohydrate Metabolism	Pyruvate metabolism	pyruvate, water dikinase [K01007]	-0.61	7.09723e-06
Unclassified	Metabolism	Others	aspartate beta-hydroxylase [K00476]	-0.61	0.00078328
Metabolism	Glycan biosynthesis and metabolism	Lipopolysaccharide biosynthesis	undecaprenyl-phosphate galactose phosphotransferase [K00996]	-0.6	8.03272e-05
Metabolism	Metabolism of Cofactors and Vitamins	Folate biosynthesis	para-aminobenzoate synthetase component I [K01665]	-0.6	0.000466904
Metabolism	Lipid metabolism	Lipid biosynthesis proteins	4-hydroxyphenylalkanoate synthase [K12430]	-0.57	0.000987354
Cellular Processes	Cellular community - prokaryotes	Biofilm formation - Vibrio cholerae	putative colanic acid biosysnthesis UDP-glucose lipid carrier transferase [K03606]	-0.57	3.86375e-05
Environmental Information Processing	Membrane transport	Transporters	multidrug efflux pump [K18142]	-0.57	1.63797e-06
Metabolism	Nucleotide Metabolism	Pyrimidine metabolism	uracil phosphoribosyltransferase [K00761]	-0.56	0.000559127
Metabolism	Energy metabolism	Sulfur metabolism	taurine transport system ATP-binding protein [K10831]	-0.55	0.000687891
Metabolism	Enzyme families	Peptidases	prolyl oligopeptidase [K01322]	-0.55	1.43525e-06
Unclassified	Genetic information processing	Protein folding and associated processing	urease accessory protein [K03189]	-0.54	4.62128e-05
Metabolism	Nucleotide Metabolism	Purine metabolism	urease subunit alpha [K01428]	-0.54	0.000187681
Metabolism	Metabolism of Cofactors and Vitamins	Porphyrin and chlorophyll metabolism	magnesium-protoporphyrin IX monomethyl ester (oxidative) cyclase [K04035]	-0.54	0.000953679
Metabolism	Metabolism of Other Amino Acids	D-Glutamine and D-glutamate metabolism	glutamate racemase [K01776]	-0.53	5.38394e-05
Genetic Information Processing	Folding, sorting and degradation	Chaperones and folding catalysts	glutaredoxin 3 [K03676]	-0.52	0.000664255
Genetic Information Processing	Replication and Repair	Homologous recombination	exodeoxyribonuclease V alpha subunit [K03581]	-0.51	4.8125e-05
Metabolism	Carbohydrate Metabolism	Pentose phosphate pathway	6-phosphogluconolactonase [K01057]	-0.51	0.000768821
Metabolism	Amino Acid Metabolism	Lysine biosynthesis	LL-diaminopimelate aminotransferase [K10206]	-0.51	0.000112307
Unclassified	Poorly characterized	Function unknown	uncharacterized protein [K06971]	-0.51	3.20881e-05
Metabolism	Energy Metabolism	Nitrogen metabolism	carbonic anhydrase [K01673]	-0.49	5.77793e-06
Metabolism	Carbohydrate Metabolism	Starch and sucrose metabolism	4-alpha-glucanotransferase [K00705]	-0.49	0.00037432
Environmental Information Processing	Membrane transport	Transporters	potassium-dependent mechanosensitive channel [K05802]	-0.47	0.000245214
Metabolism	Carbohydrate Metabolism	Pentose phosphate pathway	deoxyribose-phosphate aldolase [K01619]	-0.46	2.3093e-07
Metabolism	Nucleotide Metabolism	Purine metabolism	adenosine deaminase [K01488]	-0.46	0.000456186
Unclassified	Poorly characterized	Function unknown	uncharacterized protein [K07098]	-0.46	0.000101662
Metabolism	Metabolism of Cofactors and Vitamins	Nicotinate and nicotinamide metabolism	nicotinate-nucleotide pyrophosphorylase (carboxylating) [K00767]	-0.45	7.16986e-09
Unclassified	Genetic information processing	Protein folding and associated processing	ATP-dependent Clp protease adaptor protein ClpS [K06891]	-0.44	2.69413e-05
Unclassified	Metabolism	Amino acid metabolism	glutathionyl-hydroquinone reductase [K07393]	-0.43	1.81259e-05
Metabolism	Metabolism of Cofactors and Vitamins	Folate biosynthesis	alkaline phosphatase D [K01113]	-0.43	0.000512935
Metabolism	Biosynthesis of Polyketides and Terpenoids	Terpenoid backbone biosynthesis	2-C-methyl-D-erythritol 4-phosphate cytidylyltransferase [K00991]	-0.42	2.43482e-05
Unclassified	Poorly characterized	General function prediction only	Fe-S cluster assembly protein SufD [K09015]	-0.42	0.000128902
Cellular Processes	Cell motility	Bacterial motility proteins	leader peptidase (prepilin peptidase) / N-methyltransferase [K02654]	-0.42	7.9923e-05
Metabolism	Biosynthesis of Polyketides and Terpenoids	Terpenoid backbone biosynthesis	2-C-methyl-D-erythritol 2,4-cyclodiphosphate synthase [K01770]	-0.41	0.000195277
Environmental Information Processing	Membrane transport	Transporters	ATP-binding cassette, subfamily B, bacterial [K06147]	-0.41	3.95668e-05
Environmental Information Processing	Membrane transport	Transporters	multidrug resistance protein, MATE family [K03327]	-0.41	0.000128487
Metabolism	Lipid Metabolism	Glycerophospholipid metabolism	phosphatidate cytidylyltransferase [K00981]	-0.4	0.000143306
Metabolism	Metabolism of Cofactors and Vitamins	Nicotinate and nicotinamide metabolism	NAD+ kinase [K00858]	-0.39	0.000578006
Metabolism	Amino Acid Metabolism	Lysine biosynthesis	UDP-N-acetylmuramoyl-tripeptide--D-alanyl-D-alanine ligase [K01929]	-0.39	7.25474e-05
Metabolism	Metabolism of Other Amino Acids	Glutathione metabolism	glutathione reductase (NADPH) [K00383]	-0.38	0.000725468
Metabolism	Biosynthesis of Polyketides and Terpenoids	Polyketide sugar unit biosynthesis	dTDP-4-dehydrorhamnose 3,5-epimerase [K01790]	-0.36	0.000124109
Metabolism	Metabolism of Cofactors and Vitamins	Biotin metabolism	8-amino-7-oxononanoate synthase [K00652]	-0.36	0.000154032
Environmental Information Processing	Membrane Transport	ABC transporters	phosphate transport system permease protein [K02037]	-0.35	8.96619e-06
Metabolism	Enzyme families	Peptidases	protease IV [K04773]	-0.35	6.83127e-08
Genetic Information Processing	Translation	Ribosome biogenesis	ribosomal protein S6--L-glutamate ligase [K05844]	-0.33	0.000558028
Metabolism	Glycan Biosynthesis and Metabolism	Peptidoglycan biosynthesis	putative peptidoglycan lipid II flippase [K03980]	-0.33	0.000658115
Metabolism	Carbohydrate Metabolism	Pentose phosphate pathway	transaldolase [K00616]	-0.3	0.000618602
Metabolism	Enzyme families	Peptidases	cell division protease FtsH [K03798]	-0.29	0.000987354
Metabolism	Enzyme families	Peptidases	carboxyl-terminal processing protease [K03797]	-0.26	0.000196211
Metabolism	Metabolism of cofactors and vitamins	Ubiquinone and other terpenoid-quinone biosynthesis	aminodeoxyfutalosine synthase [K18285]	0.4	0.000794927
Unclassified	Metabolism	Others	retinol dehydrogenase 14 [K11162]	0.44	0.000314735
Unclassified	Genetic information processing	Protein folding and associated processing	hydrogenase expression/formation protein HypD [K04654]	0.48	0.000794927
Unclassified	Genetic information processing	Protein folding and associated processing	hydrogenase maturation protein HypF [K04656]	0.48	1.333e-07
Unclassified	Cellular processes and signaling	Inorganic ion transport and metabolism	arylsulfatase I/J [K12375]	0.51	0.000233327
Metabolism	Carbohydrate Metabolism	Starch and sucrose metabolism	alpha-amylase [K07405]	0.55	0.00012958
Metabolism	Metabolism of Cofactors and Vitamins	Ubiquinone and other terpenoid-quinone biosynthesis	cyclic dehypoxanthinyl futalosine synthase [K11784]	0.58	8.12279e-06
Metabolism	Carbohydrate Metabolism	Glycolysis / Gluconeogenesis	aldehyde dehydrogenase family 7 member A1 [K14085]	0.59	0.000176957
Unclassified	Metabolism	Energy metabolism	NADP-reducing hydrogenase subunit HndC [K18331]	0.6	0.000198648
Metabolism	Carbohydrate Metabolism	Pentose and glucuronate interconversions	L-ribulokinase [K00853]	0.66	0.000657763
Metabolism	Carbohydrate metabolism	Pyruvate metabolism	phosphoenolpyruvate carboxykinase (diphosphate) [K20370]	0.73	0.000589468
Metabolism	Nucleotide Metabolism	Pyrimidine metabolism	carbamoyl-phosphate synthase / aspartate carbamoyltransferase / dihydroorotase [K11540]	0.77	1.9901e-05
Metabolism	Carbohydrate Metabolism	Glycolysis / Gluconeogenesis	phosphoenolpyruvate carboxykinase (GTP) [K01596]	0.79	0.000437532
Unclassified	Cellular processes and signaling	Cell growth	spore maturation protein A [K06373]	0.8	5.14978e-05
Metabolism	Enzyme families	Peptidases	lysyl endopeptidase [K01337]	0.8	0.000212253
Unclassified	Poorly characterized	Function unknown	uncharacterized protein [K09131]	0.81	7.25474e-05
Metabolism	Carbohydrate Metabolism	Starch and sucrose metabolism	glycogen(starch) synthase [K00693]	0.82	0.000124753
Metabolism	Glycan Biosynthesis and Metabolism	Other glycan degradation	alpha-L-fucosidase [K01206]	0.83	0.000524082
Environmental Information Processing	Signal Transduction	Two-component system	two-component system, OmpR family, response regulator BaeR [K07664]	0.87	0.000440649
Metabolism	Nucleotide metabolism	Purine metabolism	cAMP and cAMP-inhibited cGMP 3',5'-cyclic phosphodiesterase 10 [K18438]	0.93	0.000456186
Unclassified	Metabolism	Energy metabolism	sulfide dehydrogenase subunit alpha [K20202]	0.95	7.81563e-05
Cellular Processes	Cell motility	Cytoskeleton proteins	MEMO1 family protein [K06990]	0.97	0.000664255
Cellular Processes	Cell motility	Cytoskeleton proteins	dynein assembly factor with WDR repeat domains 1 [K19760]	1.01	6.11901e-09
Metabolism	Carbohydrate Metabolism	Fructose and mannose metabolism	L-rhamnose isomerase [K01813]	1.09	8.07871e-06
Metabolism	Enzyme families	Peptidases	tripeptidyl-peptidase II [K01280]	1.14	3.66369e-09
Genetic Information Processing	Folding, Sorting and Degradation	RNA degradation	exosome complex exonuclease RRP6 [K12591]	1.14	2.49387e-07
Metabolism	Xenobiotics biodegradation and metabolism	Chloroalkane and chloroalkene degradation	acetylene hydratase [K20625]	1.18	2.58848e-05
Unclassified	Metabolism	Energy metabolism	NADP-reducing hydrogenase subunit HndD [K18332]	1.18	2.97599e-11
Cellular Processes	Cellular community - prokaryotes	Quorum sensing	3-hydroxy-5-phosphonooxypentane-2,4-dione thiolase [K08321]	1.19	0.000437775
Metabolism	Carbohydrate Metabolism	Fructose and mannose metabolism	L-fucose isomerase [K01818]	1.2	4.623e-05
Unclassified	Metabolism	Amino acid metabolism	protein MpaA [K14054]	1.22	0.000946657
Metabolism	Lipid Metabolism	Sphingolipid metabolism	glucosylceramidase [K01201]	1.27	0.000524082
Unclassified	Cellular processes and signaling	Cell growth	spore coat polysaccharide biosynthesis protein SpsF [K07257]	1.31	2.36748e-06
Unclassified	Metabolism	Energy metabolism	[NiFe] hydrogenase diaphorase moiety large subunit [K18005]	1.32	3.72496e-09
Metabolism	Carbohydrate Metabolism	Pyruvate metabolism	homocitrate synthase [K01655]	1.34	0.000408177
Metabolism	Carbohydrate Metabolism	Glycolysis / Gluconeogenesis	aldehyde:ferredoxin oxidoreductase [K03738]	1.44	0.000794094
Metabolism	Energy Metabolism	Nitrogen metabolism	carbamoyl-phosphate synthase (ammonia) [K01948]	1.57	7.60179e-05
Unclassified	Metabolism	Energy metabolism	sulfide dehydrogenase subunit beta [K20203]	1.57	0.000118717
Unclassified	Metabolism	Energy metabolism	NAD-reducing hydrogenase small subunit [K18007]	1.65	0.000205025
Metabolism	Energy Metabolism	Sulfur metabolism	adenylylsulfate reductase, subunit A [K00394]	1.79	9.14926e-05
Metabolism	Energy Metabolism	Methane metabolism	heterodisulfide reductase subunit A [K03388]	2.05	1.82916e-08
Metabolism	Glycan biosynthesis and metabolism	Other glycan degradation	alpha-L-fucosidase 2 [K15923]	2.09	2.67734e-12
Metabolism	Energy Metabolism	Methane metabolism	heterodisulfide reductase subunit C [K03390]	2.19	0.000526972
Unclassified	Metabolism	Energy metabolism	heterodisulfide reductase iron-sulfur subunit [K18501]	2.26	5.15583e-05
Metabolism	Energy Metabolism	Methane metabolism	methanol---5-hydroxybenzimidazolylcobamide Co-methyltransferase [K04480]	2.36	0.000385716
Metabolism	Energy Metabolism	Sulfur metabolism	adenylylsulfate reductase, subunit B [K00395]	2.6	0.000220575
Unclassified	Poorly characterized	General function prediction only	ecotin [K08276]	2.65	0.000149718
Unclassified	Metabolism	Biosynthesis and biodegradation of secondary metabolites	phenolic acid decarboxylase [K13727]	2.79	3.82843e-05
Unclassified	Metabolism	Energy metabolism	heterodisulfide reductase cytochrome b-like subunit [K18500]	3	9.50262e-05
Unclassified	Poorly characterized	Function unknown	uncharacterized protein [K09766]	4.11	0.000657763

## Sheet: Pustular vs. Colloform
Table S1. Differentially abundant genes derived from pairwise comparisons of metagenomes
Level_1	Level_2	Level_3	Level_4	log2FoldChange	p-value (adjusted)
Unclassified	Genetic information processing	Replication, recombination and repair proteins	spore photoproduct lyase [K03716]	-5.82	4.07396e-12
Metabolism	Energy Metabolism	Photosynthesis	photosystem I 4.8kDa protein [K02702]	-5.43	1.03995e-08
Genetic Information Processing	Translation	Mitochondrial biogenesis	mitochondrial genome maintenance exonuclease 1 [K19465]	-4.79	1.73541e-09
Metabolism	Enzyme families	Peptidases	alkaline phosphatase isozyme conversion protein [K09612]	-3.83	1.82441e-05
Metabolism	Energy Metabolism	Photosynthesis - antenna proteins	CpeT protein [K05383]	-2.93	0.000600175
Unclassified	Genetic information processing	Replication, recombination and repair proteins	type 1 fimbriae regulatory protein FimE [K07358]	-2.81	1.74319e-09
Metabolism	Energy Metabolism	Photosynthesis	photosystem I subunit XII [K02700]	-2.78	2.9248e-06
Metabolism	Enzyme families	Cytochrome P731	fatty-acid peroxygenase [K15629]	-2.75	0.000479108
Metabolism	Amino Acid Metabolism	Alanine, aspartate and glutamate metabolism	aspartoacylase [K01437]	-2.74	0.000223214
Unclassified	Genetic information processing	Replication, recombination and repair proteins	type 1 fimbriae regulatory protein FimB [K07357]	-2.64	1.07278e-13
Environmental Information Processing	Membrane transport	Transporters	xanthine permease XanP [K16345]	-2.63	1.04368e-15
Environmental Information Processing	Membrane transport	Transporters	xanthine permease XanQ [K16346]	-2.53	1.08622e-08
Metabolism	Nucleotide Metabolism	Purine metabolism	xanthine dehydrogenase YagS FAD-binding subunit [K11178]	-2.43	7.93342e-18
Metabolism	Energy Metabolism	Photosynthesis	photosystem II Psb27 protein [K08902]	-2.42	2.75937e-11
Metabolism	Glycan biosynthesis and metabolism	Other glycan degradation	non-lysosomal glucosylceramidase [K17108]	-2.36	6.51715e-09
Metabolism	Energy Metabolism	Methane metabolism	catalase [K03781]	-2.29	7.51073e-05
Environmental Information Processing	Membrane transport	Transporters	probable blue pigment (indigoidine) exporter [K15269]	-2.29	2.26777e-06
Environmental Information Processing	Membrane Transport	ABC transporters	manganese transport system permease protein [K11602]	-2.28	2.91315e-07
Metabolism	Energy Metabolism	Photosynthesis	photosystem II PsbT protein [K02718]	-2.26	3.12223e-05
Metabolism	Energy Metabolism	Photosynthesis	photosystem I subunit III [K02694]	-2.17	3.01858e-05
Environmental Information Processing	Membrane transport	Transporters	MFS transporter, ACS family, D-galactonate transporter [K08194]	-2.15	3.87035e-05
Unclassified	Poorly characterized	Function unknown	uncharacterized protein [K07123]	-2.14	6.16484e-14
Metabolism	Nucleotide metabolism	Purine metabolism	FAD-dependent urate hydroxylase [K16839]	-2.12	3.401e-13
Unclassified	Cellular processes and signaling	Inorganic ion transport and metabolism	nickel superoxide dismutase [K00518]	-2.07	2.12537e-05
Unclassified	Poorly characterized	Function unknown	uncharacterized protein [K07076]	-2.04	0.000532773
Metabolism	Energy Metabolism	Photosynthesis	cytochrome c6 [K08906]	-2.02	0.000641921
Metabolism	Metabolism of terpenoids and polyketides	Carotenoid biosynthesis	beta-carotene isomerase [K17911]	-2.01	0.000348161
Metabolism	Biosynthesis of Other Secondary Metabolites	Tropane, piperidine and pyridine alkaloid biosynthesis	homospermidine synthase [K00808]	-2.01	4.93848e-06
Metabolism	Energy Metabolism	Photosynthesis	photosystem II oxygen-evolving enhancer protein 1 [K02716]	-2	3.89341e-05
Metabolism	Nucleotide Metabolism	Purine metabolism	xanthine dehydrogenase YagR molybdenum-binding subunit [K11177]	-2	2.06558e-20
Metabolism	Energy Metabolism	Photosynthesis	photosystem I subunit X [K02698]	-1.99	2.45376e-05
Metabolism	Carbohydrate metabolism	Galactose metabolism	D-tagatose-1,6-bisphosphate aldolase subunit GatZ/KbaZ [K16371]	-1.98	0.000106144
Human Diseases	Drug resistance	Antimicrobial resistance genes	chloramphenicol 3-O phosphotransferase [K18554]	-1.98	2.94402e-06
Metabolism	Carbohydrate metabolism	Amino sugar and nucleotide sugar metabolism	exo-1,4-beta-D-glucosaminidase [K15855]	-1.94	2.9248e-06
Metabolism	Carbohydrate Metabolism	Amino sugar and nucleotide sugar metabolism	N-acylglucosamine-6-phosphate 2-epimerase [K01788]	-1.91	2.0081e-08
Genetic Information Processing	Translation	Transfer RNA biogenesis	tRNA (guanine26-N2/guanine27-N2)-dimethyltransferase [K00555]	-1.9	3.8714e-05
Metabolism	Biosynthesis of Other Secondary Metabolites	Isoquinoline alkaloid biosynthesis	morphine 6-dehydrogenase [K03378]	-1.87	5.56122e-05
Unclassified	Metabolism	Amino acid metabolism	glyoxylase I family protein [K08234]	-1.87	0.000765628
Metabolism	Amino Acid Metabolism	Phenylalanine, tyrosine and tryptophan biosynthesis	anthranilate synthase [K13503]	-1.86	1.03651e-06
Environmental Information Processing	Membrane Transport	ABC transporters	bicarbonate transport system substrate-binding protein [K11950]	-1.85	6.54305e-07
Unclassified	Metabolism	Metabolism of cofactors and vitamins	phytol kinase [K18678]	-1.84	2.82863e-05
Metabolism	Carbohydrate metabolism	Starch and sucrose metabolism	NA [K07024]	-1.84	2.74778e-08
Cellular Processes	Transport and catabolism	Prokaryotic Defense System	toxin YoeB [K19158]	-1.83	0.000252472
Environmental Information Processing	Signal Transduction	Calcium signaling pathway	phosphorylase kinase alpha/beta subunit [K07190]	-1.82	0.000102193
Metabolism	Nucleotide Metabolism	Purine metabolism	phosphoribosylglycinamide formyltransferase 2 [K08289]	-1.81	7.93342e-18
Environmental Information Processing	Membrane Transport	ABC transporters	manganese transport system ATP-binding protein [K11603]	-1.81	2.43205e-12
Genetic Information Processing	Replication and repair	Chromosome and associated proteins	cell division inhibitor SepF [K09772]	-1.8	4.46269e-06
Environmental Information Processing	Membrane Transport	ABC transporters	glutamate/aspartate transport system permease protein [K10002]	-1.78	0.000433883
Cellular Processes	Transport and catabolism	Prokaryotic Defense System	antitoxin YefM [K19159]	-1.77	0.000252472
Metabolism	Energy Metabolism	Photosynthesis - antenna proteins	phycocyanin-associated, rod [K02287]	-1.77	0.000745357
Cellular Processes	Cellular community - prokaryotes	Quorum sensing	acyl homoserine lactone synthase [K13060]	-1.73	0.000361977
Unclassified	Genetic information processing	Replication, recombination and repair proteins	putative transposase [K07498]	-1.72	5.76114e-06
Metabolism	Energy Metabolism	Oxidative phosphorylation	NAD(P)H-quinone oxidoreductase subunit N [K05585]	-1.71	2.4444e-06
Genetic Information Processing	Translation	Ribosome biogenesis	ribonuclease III family protein [K11145]	-1.71	6.72805e-06
Metabolism	Energy Metabolism	Photosynthesis	photosystem I subunit II [K02692]	-1.7	0.000759528
Environmental Information Processing	Membrane transport	Transporters	solute carrier family 12 (potassium/chloride transporters), member 8 [K14428]	-1.69	3.93297e-06
Metabolism	Energy Metabolism	Photosynthesis - antenna proteins	phycocyanobilin lyase beta subunit [K02289]	-1.68	2.59818e-06
Metabolism	Metabolism of Cofactors and Vitamins	Ubiquinone and other terpenoid-quinone biosynthesis	tocopherol cyclase [K09834]	-1.65	0.000163616
Genetic Information Processing	Replication and repair	DNA repair and recombination proteins	DNA polymerase V [K03502]	-1.65	3.11157e-10
Metabolism	Energy Metabolism	Oxidative phosphorylation	NAD(P)H-quinone oxidoreductase subunit H [K05579]	-1.65	3.87035e-05
Metabolism	Metabolism of Cofactors and Vitamins	Vitamin B6 metabolism	pyridoxine 4-dehydrogenase [K05275]	-1.61	1.56115e-08
Metabolism	Metabolism of Cofactors and Vitamins	Porphyrin and chlorophyll metabolism	phycocyanobilin:ferredoxin oxidoreductase [K05371]	-1.61	0.000566416
Unclassified	Poorly characterized	Function unknown	uncharacterized protein [K09775]	-1.59	0.000637679
Genetic Information Processing	Replication and repair	DNA repair and recombination proteins	DNA polymerase V [K03503]	-1.59	0.000199117
Unclassified	Metabolism	Carbohydrate metabolism	carbon dioxide concentrating mechanism protein CcmO [K08700]	-1.59	3.95607e-05
Metabolism	Metabolism of Cofactors and Vitamins	Ubiquinone and other terpenoid-quinone biosynthesis	homogentisate phytyltransferase / homogentisate geranylgeranyltransferase [K09833]	-1.59	4.72341e-05
Unclassified	Metabolism	Carbohydrate metabolism	glucosylglycerol-phosphate synthase [K03692]	-1.59	8.89811e-09
Metabolism	Glycan biosynthesis and metabolism	Glycosyltransferases	succinoglycan biosynthesis protein ExoL [K16558]	-1.57	3.12223e-05
Metabolism	Metabolism of terpenoids and polyketides	Tetracycline biosynthesis	tetracycline 7-halogenase / FADH2 O2-dependent halogenase [K14257]	-1.55	2.82879e-06
Metabolism	Energy Metabolism	Photosynthesis - antenna proteins	phycobilisome core component [K02097]	-1.53	0.000580262
Unclassified	Metabolism	Carbohydrate metabolism	carbon dioxide concentrating mechanism protein CcmM [K08698]	-1.52	0.000233909
Metabolism	Nucleotide Metabolism	Purine metabolism	xanthine dehydrogenase YagT iron-sulfur-binding subunit [K13483]	-1.5	3.53402e-13
Genetic Information Processing	Replication and repair	Chromosome and associated proteins	G-protein signaling modulator 2 [K15837]	-1.5	0.000580262
Metabolism	Metabolism of Cofactors and Vitamins	Porphyrin and chlorophyll metabolism	threonine-phosphate decarboxylase [K04720]	-1.49	6.0857e-05
Unclassified	Poorly characterized	Function unknown	uncharacterized protein [K09118]	-1.48	6.38687e-09
Metabolism	Nucleotide Metabolism	Purine metabolism	ATP adenylyltransferase [K00988]	-1.47	6.90792e-06
Unclassified	Genetic information processing	Protein folding and associated processing	alkyl hydroperoxide reductase subunit F [K03387]	-1.47	3.97416e-08
Metabolism	Glycan biosynthesis and metabolism	Glycosyltransferases	1,2-diacylglycerol 3-beta-glucosyltransferase [K19003]	-1.47	3.27628e-06
Metabolism	Biosynthesis of Polyketides and Terpenoids	Carotenoid biosynthesis	zeta-carotene desaturase [K00514]	-1.46	0.000218957
Metabolism	Metabolism of Cofactors and Vitamins	Porphyrin and chlorophyll metabolism	magnesium-protoporphyrin O-methyltransferase [K03428]	-1.45	0.000326617
Metabolism	Enzyme families	Peptidases	cyanophycinase [K13282]	-1.45	3.9316e-07
Metabolism	Metabolism of terpenoids and polyketides	Sesquiterpenoid and triterpenoid biosynthesis	dammaradiene synthase [K15810]	-1.43	9.22358e-13
Unclassified	Metabolism	Carbohydrate metabolism	endo-1,4-beta-xylanase [K01181]	-1.41	5.44025e-15
Genetic Information Processing	Translation	Ribosome biogenesis	mitochondrial GTPase 1 [K19828]	-1.41	0.000296215
Unclassified	Metabolism	Carbohydrate metabolism	carbon dioxide concentrating mechanism protein CcmK [K08696]	-1.41	0.00015545
Environmental Information Processing	Membrane Transport	ABC transporters	manganese/iron transport system substrate-binding protein [K11604]	-1.4	7.62109e-28
Metabolism	Biosynthesis of Polyketides and Terpenoids	Carotenoid biosynthesis	prolycopene isomerase [K09835]	-1.4	1.96044e-06
Unclassified	Metabolism	Glycan biosynthesis and metabolism	exopolysaccharide production protein ExoQ [K16567]	-1.39	4.43314e-05
Metabolism	Energy Metabolism	Photosynthesis	photosystem II 13kDa protein [K08903]	-1.37	0.000421285
Unclassified	Cellular processes and signaling	Signal transduction mechanisms	circadian clock protein KaiC [K08482]	-1.37	1.02018e-05
Unclassified	Genetic information processing	Protein folding and associated processing	osmotically inducible protein OsmC [K04063]	-1.35	0.000631521
Metabolism	Energy Metabolism	Oxidative phosphorylation	NAD(P)H-quinone oxidoreductase subunit 2 [K05573]	-1.35	0.000825872
Metabolism	Enzyme families	Protein phosphatase and associated proteins	pseudouridine 5'-phosphatase [K17623]	-1.35	1.0256e-05
Unclassified	Cellular processes and signaling	Inorganic ion transport and metabolism	periplasmic glucans biosynthesis protein [K03670]	-1.34	4.44282e-07
Metabolism	Glycan Biosynthesis and Metabolism	Glycosaminoglycan biosynthesis - heparan sulfate / heparin	[heparan sulfate]-glucosamine 3-sulfotransferase 3 [K07809]	-1.32	0.000289697
Unclassified	Metabolism	Metabolism of cofactors and vitamins	all-trans-8'-apo-beta-carotenal 15,15'-oxygenase [K00464]	-1.31	4.02009e-06
Metabolism	Lipid Metabolism	Arachidonic acid metabolism	prostaglandin-endoperoxide synthase 2 [K11987]	-1.3	0.000233909
Metabolism	Metabolism of Cofactors and Vitamins	Porphyrin and chlorophyll metabolism	protochlorophyllide reductase [K00218]	-1.3	0.00030904
Metabolism	Metabolism of Cofactors and Vitamins	Porphyrin and chlorophyll metabolism	biliverdin reductase [K00214]	-1.29	0.000637679
Unclassified	Metabolism	Others	2,5-diketo-D-gluconate reductase A [K06221]	-1.29	1.86347e-05
Metabolism	Metabolism of Cofactors and Vitamins	Porphyrin and chlorophyll metabolism	uroporphyrinogen-III synthase [K01719]	-1.26	2.99619e-06
Genetic Information Processing	Translation	Transfer RNA biogenesis	exoribonuclease II [K01147]	-1.26	5.76114e-06
Metabolism	Amino Acid Metabolism	Phenylalanine, tyrosine and tryptophan biosynthesis	chorismate mutase [K06208]	-1.26	0.000187501
Environmental Information Processing	Membrane Transport	ABC transporters	glutamine transport system substrate-binding protein [K10036]	-1.24	4.63321e-05
Unclassified	Metabolism	Biosynthesis and biodegradation of secondary metabolites	adenosyl-chloride synthase [K21153]	-1.23	0.000424904
Metabolism	Carbohydrate Metabolism	Starch and sucrose metabolism	cellulose synthase (UDP-forming) [K00694]	-1.22	6.09517e-06
Unclassified	Genetic information processing	Replication, recombination and repair proteins	putative N6-adenine-specific DNA methylase [K07444]	-1.22	9.87233e-18
Environmental Information Processing	Membrane transport	Transporters	solute carrier family 5 (sodium/myo-inositol cotransporter), member 11 [K14391]	-1.21	0.00030904
Environmental Information Processing	Membrane transport	ABC transporters	energy-coupling factor transport system permease protein [K16785]	-1.21	8.72911e-05
Metabolism	Lipid Metabolism	Glycerolipid metabolism	glycerol dehydrogenase [K00005]	-1.2	2.42565e-07
Metabolism	Carbohydrate metabolism	Glyoxylate and dicarboxylate metabolism	D-glycerate 3-kinase [K15918]	-1.2	0.00049746
Environmental Information Processing	Membrane Transport	ABC transporters	ATP-binding cassette, subfamily B, bacterial HlyB/CyaB [K11004]	-1.19	2.29773e-09
Metabolism	Energy Metabolism	Nitrogen metabolism	ferredoxin-nitrate reductase [K00367]	-1.19	5.1223e-06
Metabolism	Glycan biosynthesis and metabolism	Peptidoglycan biosynthesis and degradation proteins	muramoyltetrapeptide carboxypeptidase [K01297]	-1.19	2.06558e-20
Metabolism	Nucleotide Metabolism	Purine metabolism	2-oxo-4-hydroxy-4-carboxy-5-ureidoimidazoline decarboxylase [K13485]	-1.18	5.29127e-09
Human Diseases	Infectious Diseases	Vibrio cholerae pathogenic cycle	RNA polymerase nonessential primary-like sigma factor [K03087]	-1.17	4.62808e-05
Metabolism	Carbohydrate Metabolism	Pentose phosphate pathway	gluconokinase [K00851]	-1.17	5.88669e-06
Genetic Information Processing	Translation	Transfer RNA biogenesis	RNA methyltransferase, TrmH family [K03437]	-1.16	8.12303e-06
Metabolism	Nucleotide Metabolism	Pyrimidine metabolism	pantoate ligase / cytidylate kinase [K13799]	-1.16	1.18963e-06
Unclassified	Cellular processes and signaling	Membrane and intracellular structural molecules	cyanophycin synthetase [K03802]	-1.16	8.27411e-11
Metabolism	Nucleotide Metabolism	Purine metabolism	5-hydroxyisourate hydrolase [K07127]	-1.15	1.17554e-08
Metabolism	Energy Metabolism	Photosynthesis - antenna proteins	phycocyanobilin lyase alpha subunit [K02288]	-1.15	3.48933e-06
Cellular Processes	Cell motility	Cytoskeleton proteins	septum site-determining protein MinC [K03610]	-1.15	3.86061e-15
Environmental Information Processing	Membrane transport	Transporters	putative MFS transporter, AGZA family, xanthine/uracil permease [K06901]	-1.15	1.33744e-07
Metabolism	Energy Metabolism	Methane metabolism	2-phosphosulfolactate phosphatase [K05979]	-1.14	2.94402e-06
Metabolism	Metabolism of Cofactors and Vitamins	Porphyrin and chlorophyll metabolism	sirohydrochlorin cobaltochelatase [K03795]	-1.13	3.29862e-07
Cellular Processes	Transport and Catabolism	Peroxisome	superoxide dismutase, Cu-Zn family [K04565]	-1.13	0.000653929
Unclassified	Metabolism	Glycan biosynthesis and metabolism	succinoglycan biosynthesis protein ExoV [K16563]	-1.12	0.000637679
Environmental Information Processing	Membrane Transport	ABC transporters	alpha-glucoside transport system substrate-binding protein [K10232]	-1.12	2.74308e-05
Environmental Information Processing	Membrane transport	Transporters	sulfate permease, SulP family [K03321]	-1.12	3.63044e-11
Metabolism	Glycan biosynthesis and metabolism	Glycosyltransferases	alpha-1,6-mannosyltransferase [K14335]	-1.11	0.000788269
Unclassified	Metabolism	Nucleotide metabolism	8-oxoguanine deaminase [K18456]	-1.1	1.6979e-05
Metabolism	Energy Metabolism	Sulfur metabolism	sulfite reductase (ferredoxin) [K00392]	-1.09	1.97788e-12
Unclassified	Metabolism	Carbohydrate metabolism	carbon dioxide concentrating mechanism protein CcmL [K08697]	-1.08	0.000664161
Unclassified	Cellular processes and signaling	Signal transduction mechanisms	cyclic-di-GMP-binding biofilm dispersal mediator protein [K19336]	-1.06	0.000252472
Metabolism	Enzyme families	Peptidases	protease I [K05520]	-1.06	0.000631521
Metabolism	Biosynthesis of Polyketides and Terpenoids	Terpenoid backbone biosynthesis	all-trans-nonaprenyl-diphosphate synthase [K05356]	-1.05	0.000441754
Metabolism	Carbohydrate Metabolism	Galactose metabolism	alpha-galactosidase [K07406]	-1.04	5.14095e-07
Metabolism	Metabolism of Cofactors and Vitamins	Porphyrin and chlorophyll metabolism	uroporphyrin-III C-methyltransferase [K02303]	-1.03	1.02653e-15
Metabolism	Metabolism of cofactors and vitamins	Porphyrin and chlorophyll metabolism	cob(I)alamin adenosyltransferase [K19221]	-1.03	3.75943e-06
Metabolism	Xenobiotics Biodegradation and Metabolism	Drug metabolism - other enzymes	thiopurine S-methyltransferase [K00569]	-1.02	4.70367e-09
Metabolism	Carbohydrate Metabolism	Amino sugar and nucleotide sugar metabolism	L-arabinokinase [K12446]	-1.02	4.74458e-05
Unclassified	Poorly characterized	Function unknown	uncharacterized protein [K07140]	-1.01	0.000786506
Metabolism	Glycan biosynthesis and metabolism	Glycosyltransferases	succinoglycan biosynthesis protein ExoA [K16557]	-0.99	0.000386706
Metabolism	Carbohydrate metabolism	Fructose and mannose metabolism	mannuronan synthase [K19290]	-0.99	1.2347e-05
Unclassified	Metabolism	Others	phosphohistidine phosphatase [K08296]	-0.99	6.10275e-05
Cellular Processes	Cell motility	Cytoskeleton proteins	cell division topological specificity factor [K03608]	-0.98	2.06509e-07
Genetic Information Processing	Replication and repair	Chromosome and associated proteins	curved DNA-binding protein [K05516]	-0.98	1.24283e-10
Cellular Processes	Transport and catabolism	Prokaryotic Defense System	tRNA(fMet)-specific endonuclease VapC [K18828]	-0.98	3.33959e-05
Environmental Information Processing	Membrane transport	Transporters	multiple sugar transport system substrate-binding protein [K02027]	-0.98	0.000429374
Metabolism	Metabolism of Cofactors and Vitamins	Ubiquinone and other terpenoid-quinone biosynthesis	tocopherol O-methyltransferase [K05928]	-0.97	0.00010378
Metabolism	Energy Metabolism	Oxidative phosphorylation	NAD(P)H-quinone oxidoreductase subunit 5 [K05577]	-0.97	0.000260339
Unclassified	Metabolism	Biosynthesis and biodegradation of secondary metabolites	tricin synthase [K18883]	-0.95	0.000676111
Environmental Information Processing	Membrane transport	Transporters	biopolymer transport protein ExbB [K03561]	-0.95	8.15998e-08
Metabolism	Metabolism of cofactors and vitamins	Ubiquinone and other terpenoid-quinone biosynthesis	NAD(P)H dehydrogenase (quinone) [K03809]	-0.95	0.00046443
Unclassified	Poorly characterized	General function prediction only	uncharacterized zinc-type alcohol dehydrogenase-like protein [K13979]	-0.94	2.75937e-11
Metabolism	Glycan Biosynthesis and Metabolism	Other glycan degradation	alpha-mannosidase [K01191]	-0.92	9.7556e-10
Metabolism	Nucleotide metabolism	Pyrimidine metabolism	ureidoacrylate peracid hydrolase [K09020]	-0.92	3.0505e-06
Environmental Information Processing	Membrane Transport	ABC transporters	ATP-binding cassette, subfamily C, bacterial [K06148]	-0.92	6.09517e-06
Metabolism	Enzyme families	Peptidases	zinc D-Ala-D-Ala dipeptidase [K08641]	-0.92	9.46145e-05
Metabolism	Glycan biosynthesis and metabolism	Glycosyltransferases	heptose III glucuronosyltransferase [K19354]	-0.92	0.000745357
Metabolism	Carbohydrate Metabolism	Amino sugar and nucleotide sugar metabolism	N-acylglucosamine 2-epimerase [K01787]	-0.91	0.000194237
Environmental Information Processing	Membrane Transport	ABC transporters	putative glutamine transport system ATP-binding protein [K10041]	-0.9	5.50025e-05
Metabolism	Nucleotide Metabolism	Pyrimidine metabolism	cytosine deaminase [K01485]	-0.9	2.40942e-10
Metabolism	Carbohydrate metabolism	Starch and sucrose metabolism	(1->4)-alpha-D-glucan 1-alpha-D-glucosylmutase [K06044]	-0.89	0.000404858
Metabolism	Amino acid metabolism	Glycine, serine and threonine metabolism	aspartate-semialdehyde dehydrogenase [K15786]	-0.88	4.13034e-05
Metabolism	Amino Acid Metabolism	Phenylalanine, tyrosine and tryptophan biosynthesis	prephenate dehydratase [K04518]	-0.87	1.57748e-05
Environmental Information Processing	Membrane transport	Transporters	large conductance mechanosensitive channel [K03282]	-0.87	2.29544e-05
Cellular Processes	Cellular community - prokaryotes	Biofilm formation - Escherichia coli	diguanylate cyclase [K21084]	-0.87	2.51047e-05
Environmental Information Processing	Signaling molecules and interaction	Bacterial toxins	putative hemolysin [K03699]	-0.86	3.12223e-05
Metabolism	Metabolism of Cofactors and Vitamins	Porphyrin and chlorophyll metabolism	cobalt-precorrin-6B (C15)-methyltransferase [K02191]	-0.86	0.00030904
Unclassified	Poorly characterized	Function unknown	uncharacterized protein [K07019]	-0.86	0.000111804
Environmental Information Processing	Membrane transport	Transporters	arsenite transporter [K03325]	-0.85	5.63343e-07
Metabolism	Metabolism of Cofactors and Vitamins	Ubiquinone and other terpenoid-quinone biosynthesis	4-hydroxybenzoate polyprenyltransferase [K03179]	-0.85	1.24879e-09
Metabolism	Metabolism of Cofactors and Vitamins	Ubiquinone and other terpenoid-quinone biosynthesis	1,4-dihydroxy-2-naphthoate octaprenyltransferase [K02548]	-0.85	0.000129327
Metabolism	Metabolism of Cofactors and Vitamins	Ubiquinone and other terpenoid-quinone biosynthesis	menaquinone-specific isochorismate synthase [K02552]	-0.84	1.57748e-05
Metabolism	Glycan biosynthesis and metabolism	Glycosyltransferases	colanic acid/amylovoran biosynthesis glycosyltransferase [K16703]	-0.83	7.8295e-06
Unclassified	Genetic information processing	Others	phage shock protein A [K03969]	-0.82	4.93848e-06
Environmental Information Processing	Membrane transport	Transporters	cobalt-zinc-cadmium efflux system protein [K16264]	-0.81	0.000587808
Metabolism	Metabolism of Cofactors and Vitamins	Ubiquinone and other terpenoid-quinone biosynthesis	2-succinyl-5-enolpyruvyl-6-hydroxy-3-cyclohexene-1-carboxylate synthase [K02551]	-0.8	1.29444e-14
Unclassified	Cellular processes and signaling	Transport	solute:Na+ symporter, SSS family [K03307]	-0.8	1.24841e-10
Environmental Information Processing	Signal Transduction	Two-component system	two-component system, NarL family, sensor histidine kinase UhpB [K07675]	-0.8	0.000785019
Metabolism	Metabolism of cofactors and vitamins	Porphyrin and chlorophyll metabolism	3,8-divinyl protochlorophyllide a 8-vinyl-reductase (ferredoxin) [K21231]	-0.8	0.000834512
Environmental Information Processing	Membrane Transport	ABC transporters	alpha-glucoside transport system permease protein [K10234]	-0.79	0.000204076
Metabolism	Biosynthesis of Polyketides and Terpenoids	Biosynthesis of siderophore group nonribosomal peptides	yersiniabactin nonribosomal peptide synthetase [K04784]	-0.79	0.00030904
Metabolism	Metabolism of Cofactors and Vitamins	Ubiquinone and other terpenoid-quinone biosynthesis	salicylate biosynthesis isochorismate synthase [K01851]	-0.78	0.000495533
Metabolism	Carbohydrate metabolism	Starch and sucrose metabolism	maltooligosyltrehalose trehalohydrolase [K01236]	-0.78	0.000102193
Metabolism	Energy Metabolism	Nitrogen metabolism	aspartate ammonia-lyase [K01744]	-0.77	0.000890965
Environmental Information Processing	Signal Transduction	Two-component system	two-component system, chemotaxis family, response regulator WspF [K13491]	-0.77	0.000202053
Metabolism	Amino acid metabolism	Alanine, aspartate and glutamate metabolism	succinate-semialdehyde dehydrogenase [K08324]	-0.77	1.17554e-08
Unclassified	Poorly characterized	Function unknown	uncharacterized protein [K09781]	-0.76	0.000260339
Metabolism	Carbohydrate Metabolism	Glycolysis / Gluconeogenesis	fructose-1,6-bisphosphatase II / sedoheptulose-1,7-bisphosphatase [K11532]	-0.75	2.01035e-07
Metabolism	Energy Metabolism	Photosynthesis	ferredoxin--NADP+ reductase [K02641]	-0.75	0.000963109
Metabolism	Energy Metabolism	Oxidative phosphorylation	NADH dehydrogenase [K03885]	-0.75	6.29222e-13
Cellular Processes	Cellular community - prokaryotes	Biofilm formation - Pseudomonas aeruginosa	AraC family transcriptional regulator, exoenzyme S synthesis regulatory protein ExsA [K20968]	-0.74	0.000885598
Metabolism	Biosynthesis of Other Secondary Metabolites	Phenylpropanoid biosynthesis	cinnamyl-alcohol dehydrogenase [K00083]	-0.73	0.000441263
Environmental Information Processing	Membrane transport	Transporters	glycerol uptake facilitator protein [K02440]	-0.73	0.000649124
Metabolism	Carbohydrate Metabolism	Glyoxylate and dicarboxylate metabolism	formamidase [K01455]	-0.73	0.000934083
Metabolism	Carbohydrate Metabolism	Inositol phosphate metabolism	inosose dehydratase [K03335]	-0.73	0.000112374
Metabolism	Carbohydrate Metabolism	Galactose metabolism	alpha-glucosidase [K01187]	-0.72	2.50285e-06
Genetic Information Processing	Transcription	Transcription factors	Fur family transcriptional regulator, ferric uptake regulator [K03711]	-0.71	0.000154466
Metabolism	Xenobiotics biodegradation and metabolism	Atrazine degradation	biuret amidohydrolase [K19837]	-0.71	4.74802e-05
Unclassified	Cellular processes and signaling	Inorganic ion transport and metabolism	putative flavoprotein involved in K+ transport [K07222]	-0.71	0.000349261
Metabolism	Lipid Metabolism	Sphingolipid metabolism	3-dehydrosphinganine reductase [K04708]	-0.71	7.84464e-08
Metabolism	Metabolism of cofactors and vitamins	Porphyrin and chlorophyll metabolism	cobalamin biosynthesis protein CobW [K02234]	-0.69	0.000923893
Metabolism	Metabolism of Cofactors and Vitamins	Porphyrin and chlorophyll metabolism	magnesium chelatase subunit D [K03404]	-0.69	0.000418898
Environmental Information Processing	Membrane Transport	ABC transporters	bicarbonate transport system ATP-binding protein [K11953]	-0.68	0.000102132
Metabolism	Carbohydrate Metabolism	Amino sugar and nucleotide sugar metabolism	N-acetylglucosamine-6-phosphate deacetylase [K01443]	-0.68	6.42662e-05
Unclassified	Poorly characterized	Function unknown	uncharacterized protein [K06971]	-0.68	9.12818e-10
Metabolism	Nucleotide metabolism	Pyrimidine metabolism	3-hydroxy acid dehydrogenase / malonic semialdehyde reductase [K16066]	-0.68	8.53092e-07
Unclassified	Cellular processes and signaling	Cell growth	stage II sporulation protein D [K06381]	-0.67	6.50839e-05
Metabolism	Carbohydrate Metabolism	Amino sugar and nucleotide sugar metabolism	CDP-glucose 4,6-dehydratase [K01709]	-0.67	0.000429374
Metabolism	Metabolism of Cofactors and Vitamins	Porphyrin and chlorophyll metabolism	adenosylcobinamide-GDP ribazoletransferase [K02233]	-0.67	5.2233e-07
Environmental Information Processing	Membrane transport	Transporters	sodium/proline symporter [K11928]	-0.66	8.72911e-05
Unclassified	Genetic information processing	Protein folding and associated processing	urease accessory protein [K03188]	-0.66	0.000454833
Metabolism	Nucleotide Metabolism	Purine metabolism	adenosine deaminase [K01488]	-0.65	3.94887e-08
Environmental Information Processing	Membrane Transport	ABC transporters	phosphate transport system substrate-binding protein [K02040]	-0.65	3.62225e-05
Metabolism	Metabolism of Cofactors and Vitamins	Ubiquinone and other terpenoid-quinone biosynthesis	2-octaprenyl-6-methoxyphenol hydroxylase [K03185]	-0.63	2.32579e-05
Unclassified	Genetic information processing	Protein folding and associated processing	urease accessory protein [K03190]	-0.63	0.000152606
Metabolism	Carbohydrate Metabolism	Pyruvate metabolism	D-lactate dehydrogenase [K03778]	-0.63	8.72911e-05
Metabolism	Carbohydrate Metabolism	Glycolysis / Gluconeogenesis	glucokinase [K00845]	-0.62	5.37495e-07
Genetic Information Processing	Transcription	Transcription factors	Fur family transcriptional regulator, peroxide stress response regulator [K09825]	-0.61	0.000773277
Metabolism	Metabolism of Other Amino Acids	D-Glutamine and D-glutamate metabolism	glutamate racemase [K01776]	-0.61	5.63343e-07
Unclassified	Metabolism	Others	adenosyl-fluoride synthase [K09134]	-0.6	0.000890965
Unclassified	Metabolism	Others	aspartate beta-hydroxylase [K00476]	-0.6	0.000471889
Metabolism	Carbohydrate Metabolism	Pyruvate metabolism	pyruvate, water dikinase [K01007]	-0.6	4.93848e-06
Metabolism	Energy Metabolism	Methane metabolism	S-formylglutathione hydrolase [K01070]	-0.6	0.000607333
Environmental Information Processing	Signal Transduction	Two-component system	two-component system, OmpR family, response regulator MprA [K07669]	-0.6	0.000105712
Metabolism	Amino Acid Metabolism	Histidine metabolism	ATP phosphoribosyltransferase regulatory subunit [K02502]	-0.58	5.41429e-05
Metabolism	Nucleotide Metabolism	Pyrimidine metabolism	uracil phosphoribosyltransferase [K00761]	-0.58	0.000204732
Environmental Information Processing	Signal Transduction	Two-component system	two-component system, OmpR family, sensor histidine kinase KdpD [K07646]	-0.58	0.000508375
Metabolism	Glycan biosynthesis and metabolism	Glycosyltransferases	N-acetylglucosaminyldiphosphoundecaprenol N-acetyl-beta-D-mannosaminyltransferase [K05946]	-0.57	3.74047e-07
Metabolism	Carbohydrate Metabolism	Starch and sucrose metabolism	sucrose-phosphate synthase [K00696]	-0.56	0.000532773
Genetic Information Processing	Replication and Repair	Homologous recombination	exodeoxyribonuclease V alpha subunit [K03581]	-0.55	3.0505e-06
Genetic Information Processing	Replication and repair	DNA repair and recombination proteins	CRISP-associated protein Cas1 [K15342]	-0.55	0.000433883
Metabolism	Metabolism of Cofactors and Vitamins	Folate biosynthesis	para-aminobenzoate synthetase component I [K01665]	-0.55	0.000962314
Metabolism	Carbohydrate Metabolism	Pentose phosphate pathway	6-phosphogluconolactonase [K01057]	-0.55	0.000138817
Metabolism	Carbohydrate Metabolism	Pentose phosphate pathway	deoxyribose-phosphate aldolase [K01619]	-0.54	7.0254e-11
Metabolism	Glycan biosynthesis and metabolism	Lipopolysaccharide biosynthesis	undecaprenyl-phosphate galactose phosphotransferase [K00996]	-0.53	0.000384028
Metabolism	Carbohydrate Metabolism	Starch and sucrose metabolism	starch synthase [K00703]	-0.53	6.83497e-06
Metabolism	Glycan biosynthesis and metabolism	Glycosyltransferases	phosphatidylinositol alpha 1,6-mannosyltransferase [K12583]	-0.52	0.000986395
Cellular Processes	Cell motility	Cytoskeleton proteins	septum site-determining protein MinD [K03609]	-0.51	0.000247943
Metabolism	Carbohydrate Metabolism	Starch and sucrose metabolism	4-alpha-glucanotransferase [K00705]	-0.51	0.000102132
Environmental Information Processing	Membrane transport	Transporters	multidrug efflux pump [K18142]	-0.49	1.75695e-05
Metabolism	Energy Metabolism	Nitrogen metabolism	ferredoxin-nitrite reductase [K00366]	-0.49	0.000353934
Metabolism	Energy Metabolism	Nitrogen metabolism	carbonic anhydrase [K01673]	-0.49	2.59818e-06
Metabolism	Nucleotide Metabolism	Purine metabolism	urease subunit alpha [K01428]	-0.49	0.000585183
Unclassified	Metabolism	Amino acid metabolism	glutathionyl-hydroquinone reductase [K07393]	-0.48	4.52939e-07
Metabolism	Metabolism of Cofactors and Vitamins	Nicotinate and nicotinamide metabolism	nicotinate-nucleotide pyrophosphorylase (carboxylating) [K00767]	-0.48	9.08063e-11
Environmental Information Processing	Membrane transport	Transporters	ATP-binding cassette, subfamily B, bacterial [K06147]	-0.47	3.40857e-07
Cellular Processes	Cell motility	Bacterial motility proteins	leader peptidase (prepilin peptidase) / N-methyltransferase [K02654]	-0.46	2.9248e-06
Metabolism	Amino Acid Metabolism	Lysine biosynthesis	UDP-N-acetylmuramoyl-tripeptide--D-alanyl-D-alanine ligase [K01929]	-0.46	3.18873e-07
Unclassified	Genetic information processing	Protein folding and associated processing	urease accessory protein [K03189]	-0.46	0.000482511
Metabolism	Energy Metabolism	Nitrogen metabolism	NAD+ synthase [K01916]	-0.46	9.01846e-05
Metabolism	Carbohydrate Metabolism	Starch and sucrose metabolism	1,4-alpha-glucan branching enzyme [K00700]	-0.43	0.000353934
Unclassified	Poorly characterized	Function unknown	uncharacterized protein [K07098]	-0.42	0.000199346
Metabolism	Glycan Biosynthesis and Metabolism	Peptidoglycan biosynthesis	putative peptidoglycan lipid II flippase [K03980]	-0.41	2.50285e-06
Metabolism	Enzyme families	Peptidases	prolyl oligopeptidase [K01322]	-0.41	0.000336584
Metabolism	Metabolism of Other Amino Acids	Glutathione metabolism	glutathione reductase (NADPH) [K00383]	-0.41	0.000111804
Metabolism	Carbohydrate Metabolism	Glycolysis / Gluconeogenesis	L-lactate dehydrogenase [K00016]	-0.41	0.000230437
Metabolism	Lipid Metabolism	Glycerophospholipid metabolism	phosphatidate cytidylyltransferase [K00981]	-0.4	8.61775e-05
Metabolism	Metabolism of Cofactors and Vitamins	Biotin metabolism	8-amino-7-oxononanoate synthase [K00652]	-0.39	7.95917e-06
Metabolism	Biosynthesis of Polyketides and Terpenoids	Polyketide sugar unit biosynthesis	dTDP-4-dehydrorhamnose 3,5-epimerase [K01790]	-0.36	6.0857e-05
Metabolism	Biosynthesis of Polyketides and Terpenoids	Polyketide sugar unit biosynthesis	dTDP-4-dehydrorhamnose reductase [K00067]	-0.36	0.000644198
Genetic Information Processing	Translation	Ribosome biogenesis	ribosomal protein S6--L-glutamate ligase [K05844]	-0.36	5.88638e-05
Metabolism	Enzyme families	Peptidases	protease IV [K04773]	-0.36	4.03406e-09
Metabolism	Carbohydrate Metabolism	Pyruvate metabolism	phosphoenolpyruvate carboxylase [K01595]	-0.35	2.43388e-05
Metabolism	Carbohydrate Metabolism	Pentose phosphate pathway	transaldolase [K00616]	-0.34	3.33959e-05
Environmental Information Processing	Membrane Transport	ABC transporters	phosphate transport system permease protein [K02037]	-0.34	6.83497e-06
Genetic Information Processing	Folding, Sorting and Degradation	RNA degradation	ATP-dependent RNA helicase DeaD [K05592]	-0.3	1.91533e-05
Metabolism	Enzyme families	Peptidases	cell division protease FtsH [K03798]	-0.3	0.000570993
Unclassified	Poorly characterized	Function unknown	uncharacterized protein [K07071]	-0.29	0.00015394
Environmental Information Processing	Membrane Transport	ABC transporters	ATP-binding cassette, subfamily B (MDR/TAP), member 1 [K05658]	-0.28	1.64086e-05
Metabolism	Carbohydrate Metabolism	Glycolysis / Gluconeogenesis	pyruvate kinase [K00873]	-0.28	0.00010838
Metabolism	Enzyme families	Peptidases	methionyl aminopeptidase [K01265]	-0.26	1.83092e-05
Metabolism	Amino Acid Metabolism	Glycine, serine and threonine metabolism	glycine dehydrogenase [K00281]	-0.25	0.000247943
Environmental Information Processing	Membrane Transport	ABC transporters	ATP-binding cassette, subfamily B, bacterial MsbA [K11085]	-0.24	0.000934083
Metabolism	Enzyme families	Peptidases	carboxyl-terminal processing protease [K03797]	-0.24	0.000444801
Environmental Information Processing	Membrane transport	Transporters	ammonium transporter, Amt family [K03320]	-0.23	0.000517058
Metabolism	Metabolism of cofactors and vitamins	Ubiquinone and other terpenoid-quinone biosynthesis	aminodeoxyfutalosine synthase [K18285]	0.39	0.000585183
Unclassified	Genetic information processing	Protein folding and associated processing	hydrogenase maturation protein HypF [K04656]	0.4	1.1856e-05
Unclassified	Metabolism	Others	retinol dehydrogenase 14 [K11162]	0.4	0.000934083
Metabolism	Lipid Metabolism	Fatty acid degradation	long-chain-acyl-CoA dehydrogenase [K00255]	0.46	0.000633358
Metabolism	Glycan Biosynthesis and Metabolism	Glycosaminoglycan degradation	N-acetylgalactosamine-6-sulfatase [K01132]	0.47	0.000973511
Metabolism	Metabolism of Cofactors and Vitamins	Ubiquinone and other terpenoid-quinone biosynthesis	cyclic dehypoxanthinyl futalosine synthase [K11784]	0.47	0.000297953
Metabolism	Lipid Metabolism	Sphingolipid metabolism	arylsulfatase A [K01134]	0.5	0.000349957
Unclassified	Cellular processes and signaling	Inorganic ion transport and metabolism	arylsulfatase I/J [K12375]	0.58	6.79514e-06
Metabolism	Lipid Metabolism	Steroid hormone biosynthesis	steryl-sulfatase [K01131]	0.59	3.80946e-06
Metabolism	Glycan Biosynthesis and Metabolism	Glycosaminoglycan degradation	arylsulfatase B [K01135]	0.66	2.9248e-06
Unclassified	Cellular processes and signaling	Transport	bile acid:Na+ symporter, BASS family [K03453]	0.69	3.62225e-05
Unclassified	Poorly characterized	Function unknown	uncharacterized protein [K09131]	0.73	0.000312097
Unclassified	Cellular processes and signaling	Cell growth	spore maturation protein A [K06373]	0.73	0.000143951
Unclassified	Metabolism	Energy metabolism	NADP-reducing hydrogenase subunit HndD [K18332]	0.75	4.74606e-05
Metabolism	Carbohydrate metabolism	Pyruvate metabolism	phosphoenolpyruvate carboxykinase (diphosphate) [K20370]	0.78	0.000120228
Metabolism	Glycan Biosynthesis and Metabolism	Other glycan degradation	alpha-L-fucosidase [K01206]	0.78	0.000885004
Genetic Information Processing	Folding, Sorting and Degradation	RNA degradation	exosome complex exonuclease RRP6 [K12591]	0.87	0.000145953
Cellular Processes	Cell motility	Cytoskeleton proteins	MEMO1 family protein [K06990]	0.93	0.000767916
Unclassified	Cellular processes and signaling	Cell growth	spore coat polysaccharide biosynthesis protein SpsF [K07257]	0.95	0.000949923
Unclassified	Metabolism	Energy metabolism	sulfide dehydrogenase subunit alpha [K20202]	0.99	1.83262e-05
Cellular Processes	Cell motility	Cytoskeleton proteins	dynein assembly factor with WDR repeat domains 1 [K19760]	1.02	9.12818e-10
Metabolism	Enzyme families	Peptidases	tripeptidyl-peptidase II [K01280]	1.04	3.22766e-08
Genetic Information Processing	Replication and repair	Chromosome and associated proteins	lysine-specific histone demethylase 1A [K11450]	1.08	0.000308161
Unclassified	Metabolism	Energy metabolism	[NiFe] hydrogenase diaphorase moiety large subunit [K18005]	1.11	5.29489e-07
Metabolism	Energy Metabolism	Oxidative phosphorylation	H+-transporting ATPase [K01535]	1.13	0.000154948
Unclassified	Metabolism	Energy metabolism	thiosulfate dehydrogenase [K19713]	1.13	0.000933732
Cellular Processes	Cellular community - prokaryotes	Quorum sensing	3-hydroxy-5-phosphonooxypentane-2,4-dione thiolase [K08321]	1.2	0.000220351
Unclassified	Metabolism	Amino acid metabolism	protein MpaA [K14054]	1.25	0.00043394
Unclassified	Poorly characterized	Function unknown	uncharacterized protein [K09974]	1.25	0.000377074
Metabolism	Energy Metabolism	Methane metabolism	heterodisulfide reductase subunit A [K03388]	1.3	0.000753846
Metabolism	Xenobiotics biodegradation and metabolism	Chloroalkane and chloroalkene degradation	acetylene hydratase [K20625]	1.34	3.08053e-07
Metabolism	Enzyme families	Protein phosphatase and associated proteins	CUB and sushi domain-containing protein [K17495]	1.43	0.000174454
Metabolism	Glycan biosynthesis and metabolism	Other glycan degradation	alpha-L-fucosidase 2 [K15923]	1.51	5.2233e-07
Unclassified	Metabolism	Energy metabolism	NAD-reducing hydrogenase small subunit [K18007]	1.51	0.000570993
Metabolism	Energy Metabolism	Sulfur metabolism	adenylylsulfate reductase, subunit A [K00394]	1.57	0.000578064
Unclassified	Metabolism	Energy metabolism	sulfide dehydrogenase subunit beta [K20203]	1.81	2.4444e-06
Genetic Information Processing	Folding, sorting and degradation	Ubiquitin system	F-box and leucine-rich repeat protein 16 [K10282]	1.84	0.000324207
Unclassified	Metabolism	Energy metabolism	heterodisulfide reductase iron-sulfur subunit [K18501]	1.88	0.000907602
Unclassified	Metabolism	Biosynthesis and biodegradation of secondary metabolites	phenolic acid decarboxylase [K13727]	3.21	5.2233e-07
